# Supplementary material for: Reactivity of a Lewis base-supported uranium terminal imido metallocene towards small molecules
Source: Royal Society of Chemistry journal article supplement (doi:10.1039/d3dt02165c), 2023-01-01
Supplement: d3dt02165c1.pdf [file d3dt02165c1.pdf]

*Supporting Information for*

# Reactivity of a Lewis base supported uranium terminal imido metallocene towards small molecules

Tongyu Li,<sup>a</sup> Dongwei Wang,<sup>a</sup> Yi Heng,<sup>a</sup> Guohua Hou,<sup>a</sup> Guofu Zi,<sup>\*,a</sup> and Marc D. Walter<sup>\*,b</sup>

<sup>a</sup>Department of Chemistry, Beijing Normal University, Beijing 100875, China

<sup>b</sup>Institut für Anorganische und Analytische Chemie, Technische Universität Braunschweig, Hagenring 30,  
38106 Braunschweig, Germany

## Table of contents

|                             |    |
|-----------------------------|----|
| 1. Crystallographic details | S2 |
| 2. Spectra                  | S5 |

## 1. Crystallographic details

**Table S1. Crystal Data and Experimental Parameters for Compounds 2, 3, 5 and 7**

| Compound                                                      | <b>2</b>                                           | <b>3</b> ·C <sub>6</sub> H <sub>14</sub>                          | <b>5</b> ·0.5C <sub>6</sub> H <sub>14</sub>                      | <b>7</b> ·0.5C <sub>6</sub> H <sub>6</sub>                                      |
|---------------------------------------------------------------|----------------------------------------------------|-------------------------------------------------------------------|------------------------------------------------------------------|---------------------------------------------------------------------------------|
| Formula                                                       | C <sub>51</sub> H <sub>75</sub> NSi <sub>6</sub> U | C <sub>55</sub> H <sub>94</sub> N <sub>4</sub> SSi <sub>6</sub> U | C <sub>44</sub> H <sub>75</sub> S <sub>2</sub> Si <sub>6</sub> U | C <sub>59</sub> H <sub>85</sub> N <sub>2</sub> O <sub>2</sub> Si <sub>6</sub> U |
| Fw                                                            | 1108.69                                            | 1249.97                                                           | 1074.73                                                          | 1260.85                                                                         |
| crystal system                                                | triclinic                                          | triclinic                                                         | triclinic                                                        | triclinic                                                                       |
| space group                                                   | <i>P</i> $\bar{1}$                                 | <i>P</i> $\bar{1}$                                                | <i>P</i> $\bar{1}$                                               | <i>P</i> $\bar{1}$                                                              |
| <i>a</i> (Å)                                                  | 11.978(1)                                          | 12.130(1)                                                         | 10.880(1)                                                        | 11.586(1)                                                                       |
| <i>b</i> (Å)                                                  | 12.258(1)                                          | 12.824(1)                                                         | 10.901(1)                                                        | 12.814(1)                                                                       |
| <i>c</i> (Å)                                                  | 21.559(1)                                          | 21.721(1)                                                         | 22.508(1)                                                        | 22.924(1)                                                                       |
| $\alpha$ (deg)                                                | 81.13(1)                                           | 96.10(1)                                                          | 77.00(1)                                                         | 95.93(1)                                                                        |
| $\beta$ (deg)                                                 | 80.21(1)                                           | 90.99(1)                                                          | 81.20(1)                                                         | 99.85(1)                                                                        |
| $\gamma$ (deg)                                                | 61.36(1)                                           | 111.07(1)                                                         | 80.41(1)                                                         | 110.41(1)                                                                       |
| <i>V</i> (Å <sup>3</sup> )                                    | 2727.99(10)                                        | 3129.66(13)                                                       | 2546.02(17)                                                      | 3093.08(11)                                                                     |
| <i>Z</i>                                                      | 2                                                  | 2                                                                 | 2                                                                | 2                                                                               |
| <i>D</i> <sub>calc</sub> (g/cm <sup>3</sup> )                 | 1.350                                              | 1.326                                                             | 1.402                                                            | 1.354                                                                           |
| $\mu$ (Mo/K $\alpha$ ) <sub>calc</sub> (cm <sup>-1</sup> )    | 9.870                                              | 8.978                                                             | 11.293                                                           | 8.802                                                                           |
| size (mm)                                                     | 0.20 × 0.15 × 0.15                                 | 0.20 × 0.15 × 0.10                                                | 0.20 × 0.15 × 0.15                                               | 0.15 × 0.10 × 0.10                                                              |
| <i>F</i> (000)                                                | 1128                                               | 1288                                                              | 1094                                                             | 1290                                                                            |
| 2 $\theta$ range (deg)                                        | 8.25 to 153.45                                     | 7.44 to 152.85                                                    | 8.12 to 154.42                                                   | 7.48 to 153.19                                                                  |
| no. of reflns, collected                                      | 38415                                              | 43435                                                             | 30768                                                            | 41774                                                                           |
| no of obsd reflns                                             | 10976                                              | 12555                                                             | 10092                                                            | 12507                                                                           |
| no of variables                                               | 554                                                | 626                                                               | 497                                                              | 652                                                                             |
| abscorr ( <i>T</i> <sub>max</sub> , <i>T</i> <sub>min</sub> ) | 1.00, 0.25                                         | 1.00, 0.69                                                        | 1.00, 0.25                                                       | 1.00, 0.89                                                                      |
| <i>R</i>                                                      | 0.041                                              | 0.049                                                             | 0.072                                                            | 0.043                                                                           |
| <i>R</i> <sub>w</sub>                                         | 0.110                                              | 0.124                                                             | 0.191                                                            | 0.099                                                                           |
| <i>R</i> <sub>all</sub>                                       | 0.042                                              | 0.054                                                             | 0.093                                                            | 0.049                                                                           |
| Gof                                                           | 1.09                                               | 1.06                                                              | 1.21                                                             | 1.11                                                                            |
| CCDC                                                          | 2277711                                            | 2277718                                                           | 2277717                                                          | 2277715                                                                         |

**Table S2. Crystal Data and Experimental Parameters for Compounds 8-10**

| Compound                                                      | <b>8</b>                                                         | <b>9</b>                                                         | <b>10</b>                                            |
|---------------------------------------------------------------|------------------------------------------------------------------|------------------------------------------------------------------|------------------------------------------------------|
| Formula                                                       | C <sub>51</sub> H <sub>79</sub> N <sub>3</sub> Si <sub>6</sub> U | C <sub>50</sub> H <sub>80</sub> N <sub>2</sub> Si <sub>6</sub> U | C <sub>41</sub> H <sub>72</sub> CINSi <sub>7</sub> U |
| Fw                                                            | 1140.74                                                          | 1115.73                                                          | 1049.10                                              |
| crystal system                                                | triclinic                                                        | monoclinic                                                       | monoclinic                                           |
| space group                                                   | <i>P</i> $\bar{1}$                                               | <i>C</i> 2/ <i>c</i>                                             | <i>P</i> 2 <sub>1</sub> / <i>c</i>                   |
| <i>a</i> (Å)                                                  | 15.711(1)                                                        | 50.490(1)                                                        | 11.067(1)                                            |
| <i>b</i> (Å)                                                  | 17.095(1)                                                        | 11.775(1)                                                        | 23.667(1)                                            |
| <i>c</i> (Å)                                                  | 23.342(1)                                                        | 38.791(1)                                                        | 19.321(2)                                            |
| $\alpha$ (deg)                                                | 69.89(1)                                                         | 90                                                               | 90                                                   |
| $\beta$ (deg)                                                 | 73.79(1)                                                         | 94.70(1)                                                         | 93.71(1)                                             |
| $\gamma$ (deg)                                                | 86.00(1)                                                         | 90                                                               | 90                                                   |
| <i>V</i> (Å <sup>3</sup> )                                    | 5650.68(10)                                                      | 22984.1(9)                                                       | 5050.0(3)                                            |
| <i>Z</i>                                                      | 4                                                                | 16                                                               | 4                                                    |
| <i>D</i> <sub>calc</sub> (g/cm <sup>3</sup> )                 | 1.341                                                            | 1.290                                                            | 1.380                                                |
| $\mu$ (Mo/K $\alpha$ ) <sub>calc</sub> (cm <sup>-1</sup> )    | 9.555                                                            | 9.378                                                            | 3.460                                                |
| size (mm)                                                     | 0.20 × 0.10 × 0.10                                               | 0.20 × 0.10 × 0.05                                               | 0.20 × 0.20 × 0.20                                   |
| <i>F</i> (000)                                                | 2328                                                             | 9120                                                             | 2128                                                 |
| 2 $\theta$ range (deg)                                        | 7.43 to 152.98                                                   | 7.03 to 153.43                                                   | 6.57 to 59.76                                        |
| no. of reflns, collected                                      | 82922                                                            | 93378                                                            | 28581                                                |
| no of obsd reflns                                             | 22813                                                            | 23043                                                            | 12225                                                |
| no of variables                                               | 1142                                                             | 1114                                                             | 486                                                  |
| abscorr ( <i>T</i> <sub>max</sub> , <i>T</i> <sub>min</sub> ) | 1.00, 0.12                                                       | 1.00, 0.66                                                       | 1.00, 0.51                                           |
| <i>R</i>                                                      | 0.041                                                            | 0.081                                                            | 0.039                                                |
| <i>R</i> <sub>w</sub>                                         | 0.107                                                            | 0.202                                                            | 0.067                                                |
| <i>R</i> <sub>all</sub>                                       | 0.044                                                            | 0.116                                                            | 0.055                                                |
| Gof                                                           | 1.04                                                             | 1.04                                                             | 1.03                                                 |
| CCDC                                                          | 2277714                                                          | 2277720                                                          | 2277721                                              |

**Table S3. Crystal Data and Experimental Parameters for Compounds 11-13**

| Compound                                                      | <b>11</b>                                           | <b>12</b>                                           | <b>13</b>                                                        |
|---------------------------------------------------------------|-----------------------------------------------------|-----------------------------------------------------|------------------------------------------------------------------|
| Formula                                                       | C <sub>35</sub> H <sub>65</sub> INSi <sub>6</sub> U | C <sub>41</sub> H <sub>70</sub> NSSi <sub>6</sub> U | C <sub>42</sub> H <sub>72</sub> N <sub>2</sub> Si <sub>6</sub> U |
| Fw                                                            | 1033.35                                             | 1015.61                                             | 1011.58                                                          |
| crystal system                                                | monoclinic                                          | triclinic                                           | triclinic                                                        |
| space group                                                   | <i>P</i> 2 <sub>1</sub> / <i>n</i>                  | <i>P</i> $\bar{1}$                                  | <i>P</i> $\bar{1}$                                               |
| <i>a</i> (Å)                                                  | 11.242(1)                                           | 11.228(1)                                           | 12.022(1)                                                        |
| <i>b</i> (Å)                                                  | 17.326(1)                                           | 19.471(1)                                           | 22.235(1)                                                        |
| <i>c</i> (Å)                                                  | 24.259(1)                                           | 22.729(1)                                           | 23.189(1)                                                        |
| $\alpha$ (deg)                                                | 90                                                  | 79.01(1)                                            | 92.12(1)                                                         |
| $\beta$ (deg)                                                 | 102.70(1)                                           | 86.50(1)                                            | 101.12(1)                                                        |
| $\gamma$ (deg)                                                | 90                                                  | 88.88(1)                                            | 97.78(1)                                                         |
| <i>V</i> (Å <sup>3</sup> )                                    | 4609.43(19)                                         | 4868.61(13)                                         | 6013.1(3)                                                        |
| <i>Z</i>                                                      | 4                                                   | 4                                                   | 4                                                                |
| <i>D</i> <sub>calc</sub> (g/cm <sup>3</sup> )                 | 1.489                                               | 1.386                                               | 1.117                                                            |
| $\mu$ (Mo/K $\alpha$ ) <sub>calc</sub> (cm <sup>-1</sup> )    | 4.370                                               | 11.395                                              | 8.913                                                            |
| size (mm)                                                     | 0.20 × 0.15 × 0.15                                  | 0.15 × 0.15 × 0.15                                  | 0.25 × 0.15 × 0.10                                               |
| <i>F</i> (000)                                                | 2044                                                | 2060                                                | 2056                                                             |
| 2 $\theta$ range (deg)                                        | 6.46 to 59.73                                       | 6.64 to 154.15                                      | 7.58 to 155.74                                                   |
| no. of reflns, collected                                      | 39104                                               | 66554                                               | 24360                                                            |
| no of obsd reflns                                             | 11494                                               | 19740                                               | 24360                                                            |
| no of variables                                               | 386                                                 | 939                                                 | 959                                                              |
| abscorr ( <i>T</i> <sub>max</sub> , <i>T</i> <sub>min</sub> ) | 1.00, 0.66                                          | 1.00, 0.57                                          | 1.00, 0.52                                                       |
| <i>R</i>                                                      | 0.054                                               | 0.053                                               | 0.108                                                            |
| <i>R</i> <sub>w</sub>                                         | 0.077                                               | 0.148                                               | 0.289                                                            |
| <i>R</i> <sub>all</sub>                                       | 0.110                                               | 0.060                                               | 0.123                                                            |
| Gof                                                           | 1.02                                                | 1.07                                                | 1.05                                                             |
| CCDC                                                          | 2277719                                             | 2277716                                             | 2277712                                                          |

### 3. Spectra

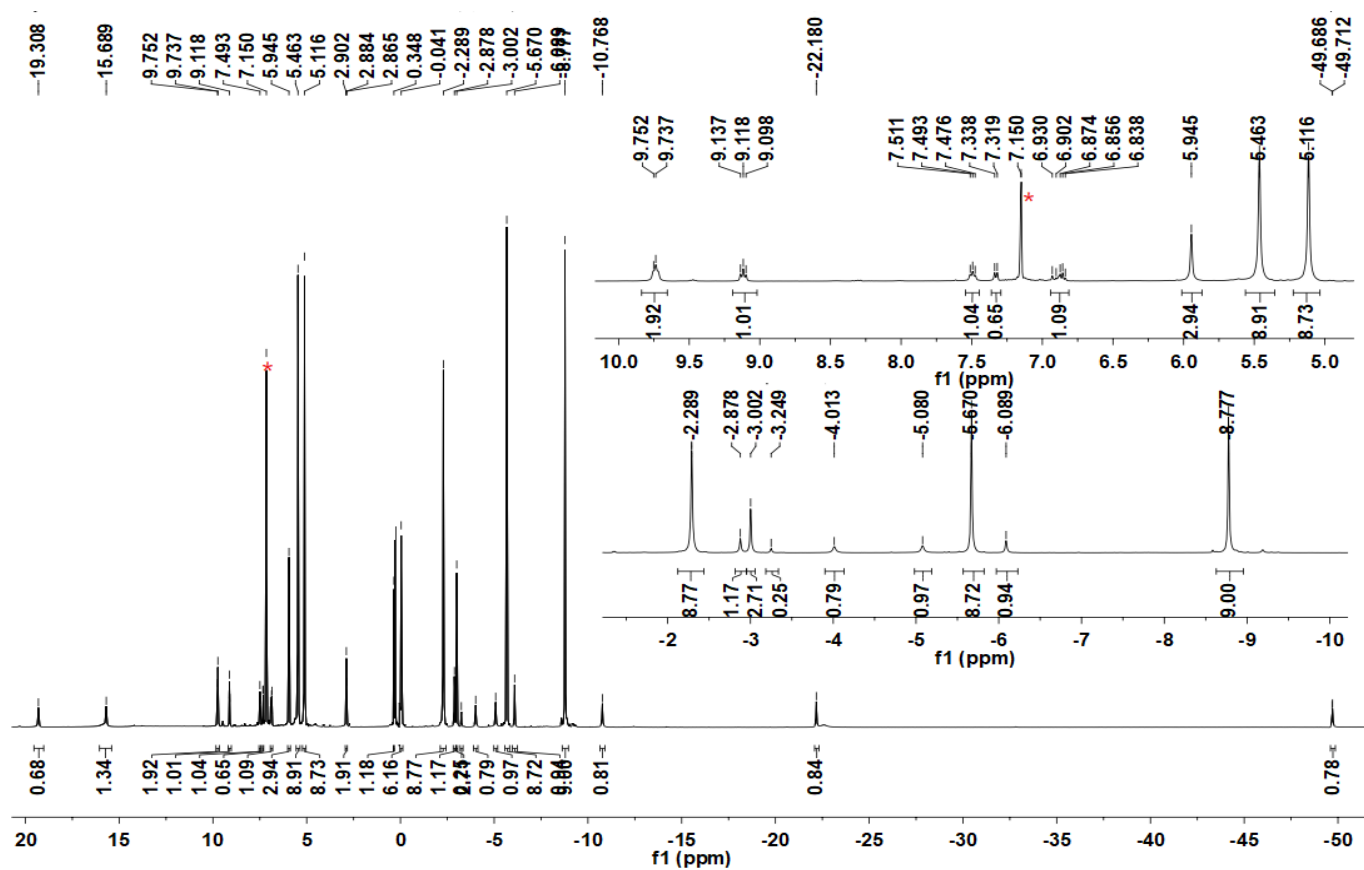

Figure S1.  $^1\text{H}$  NMR spectrum for compound 2.

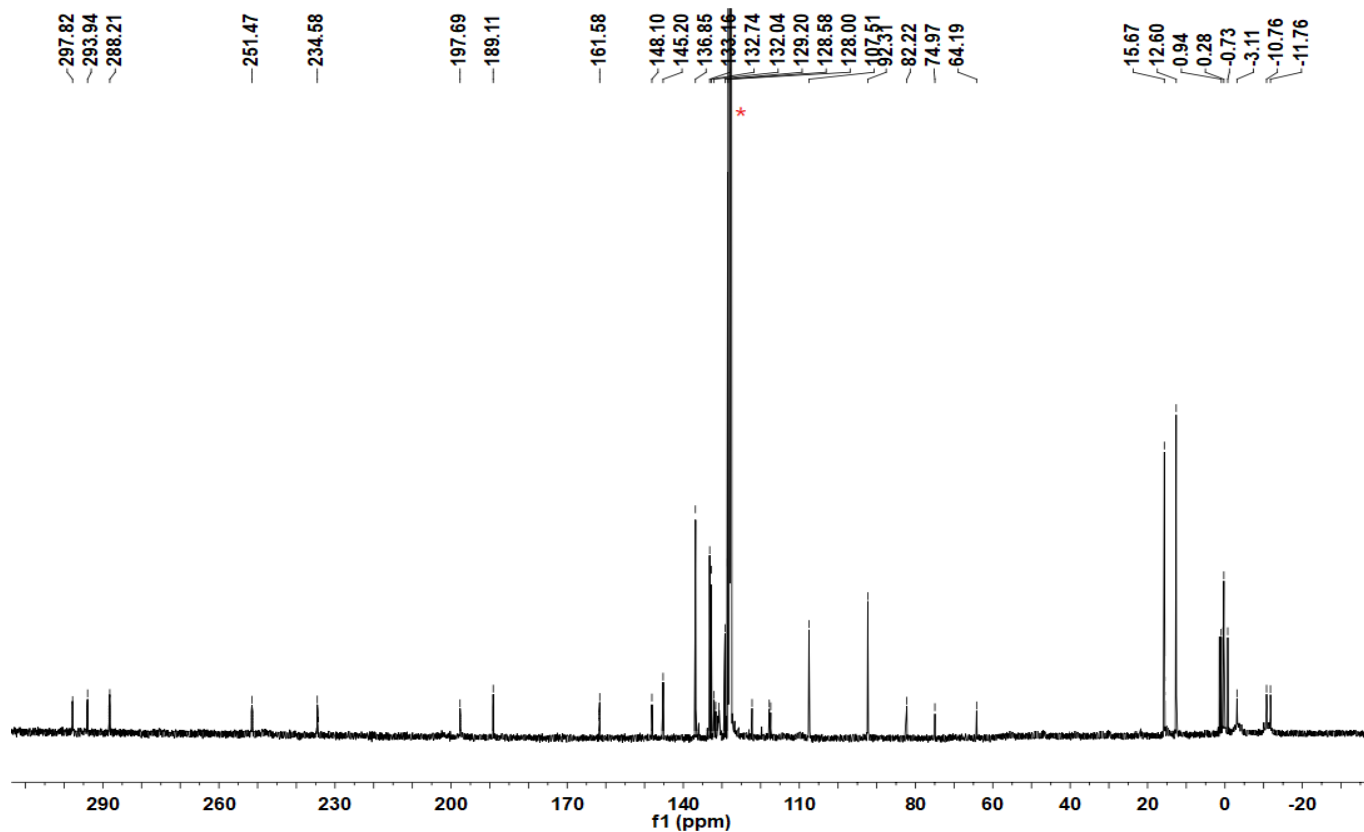

Figure S2.  $^{13}\text{C}$  NMR spectrum for compound 2.

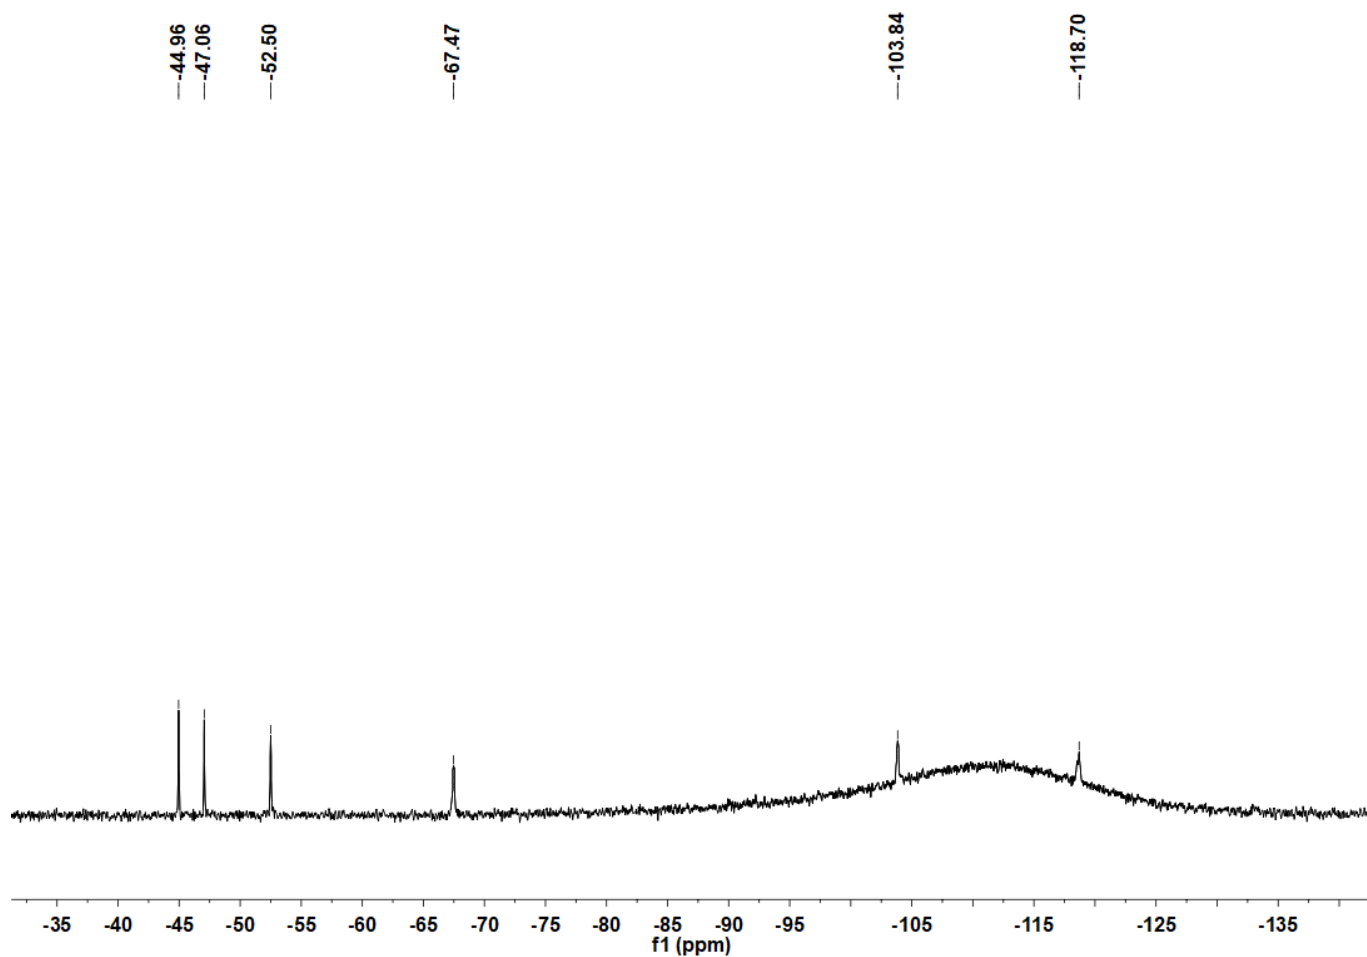

Figure S3.  $^{29}\text{Si}$  NMR spectrum for compound 2.

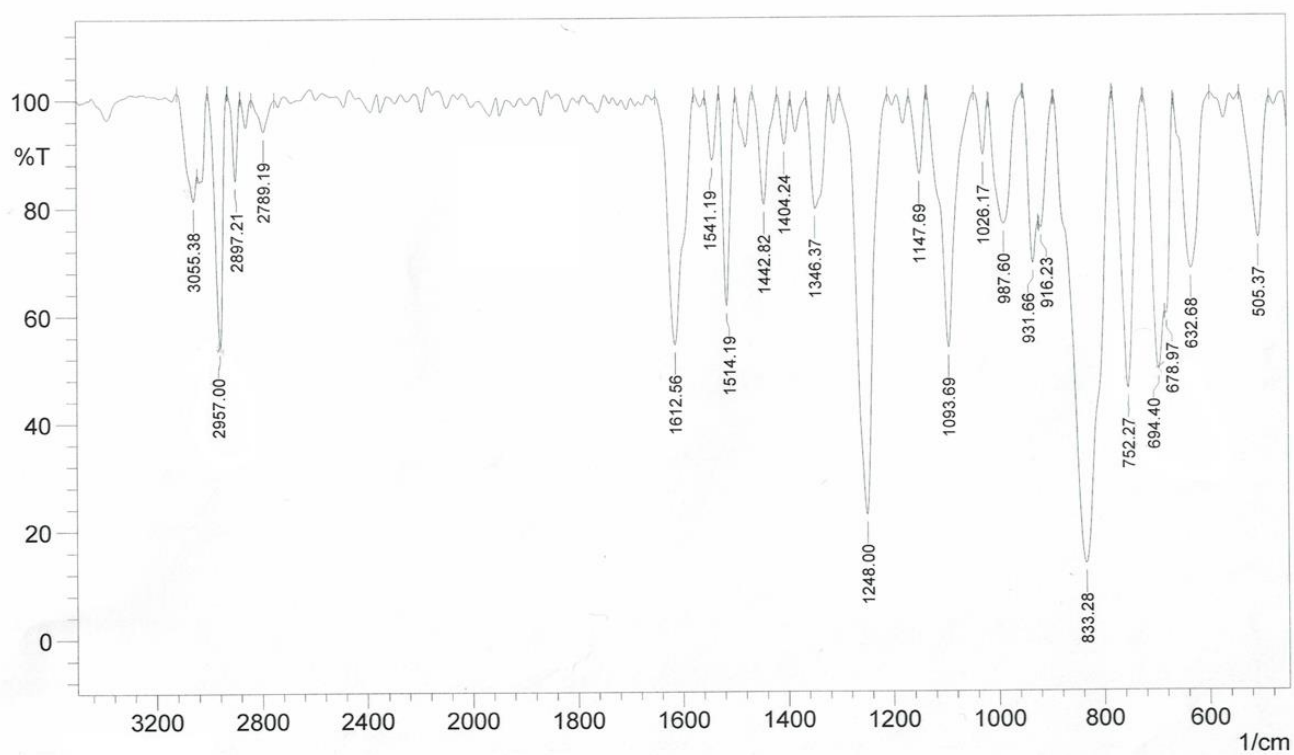

Figure S4. IR spectrum for compound 2.

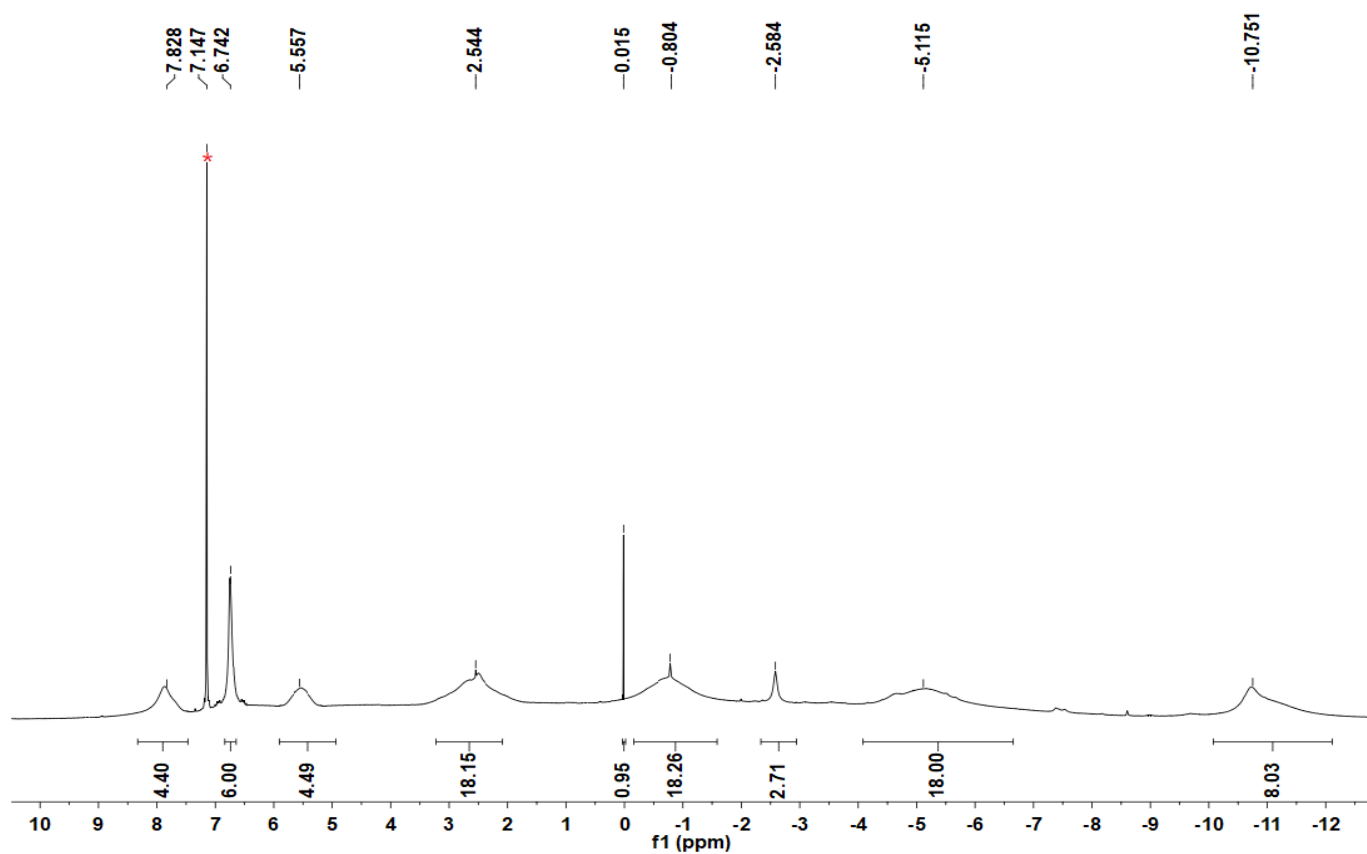

Figure S5.  $^1\text{H}$  NMR spectrum for compound 3.

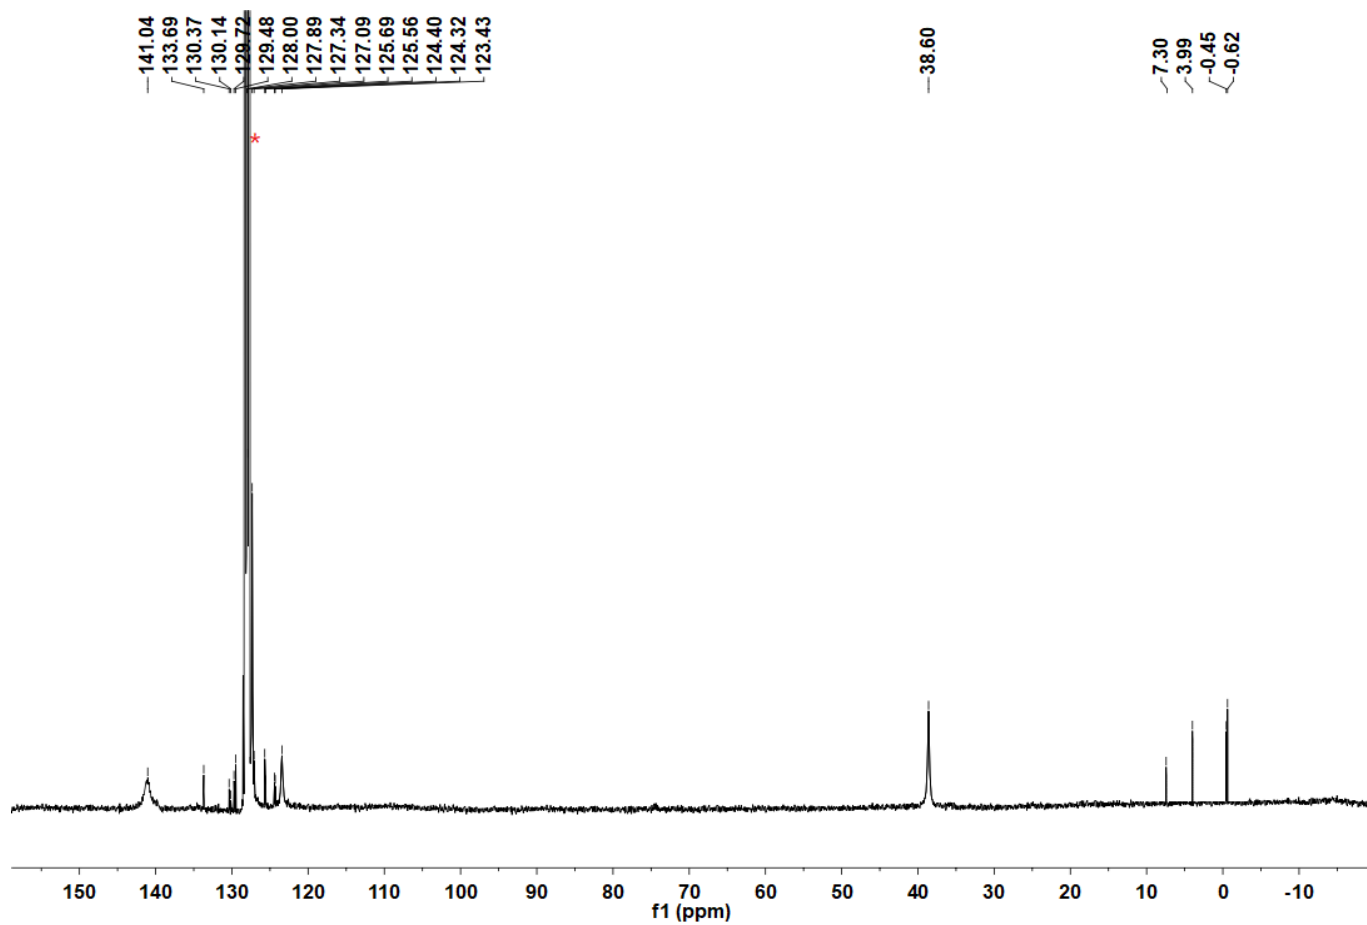

Figure S6.  $^{13}\text{C}$  NMR spectrum for compound 3.

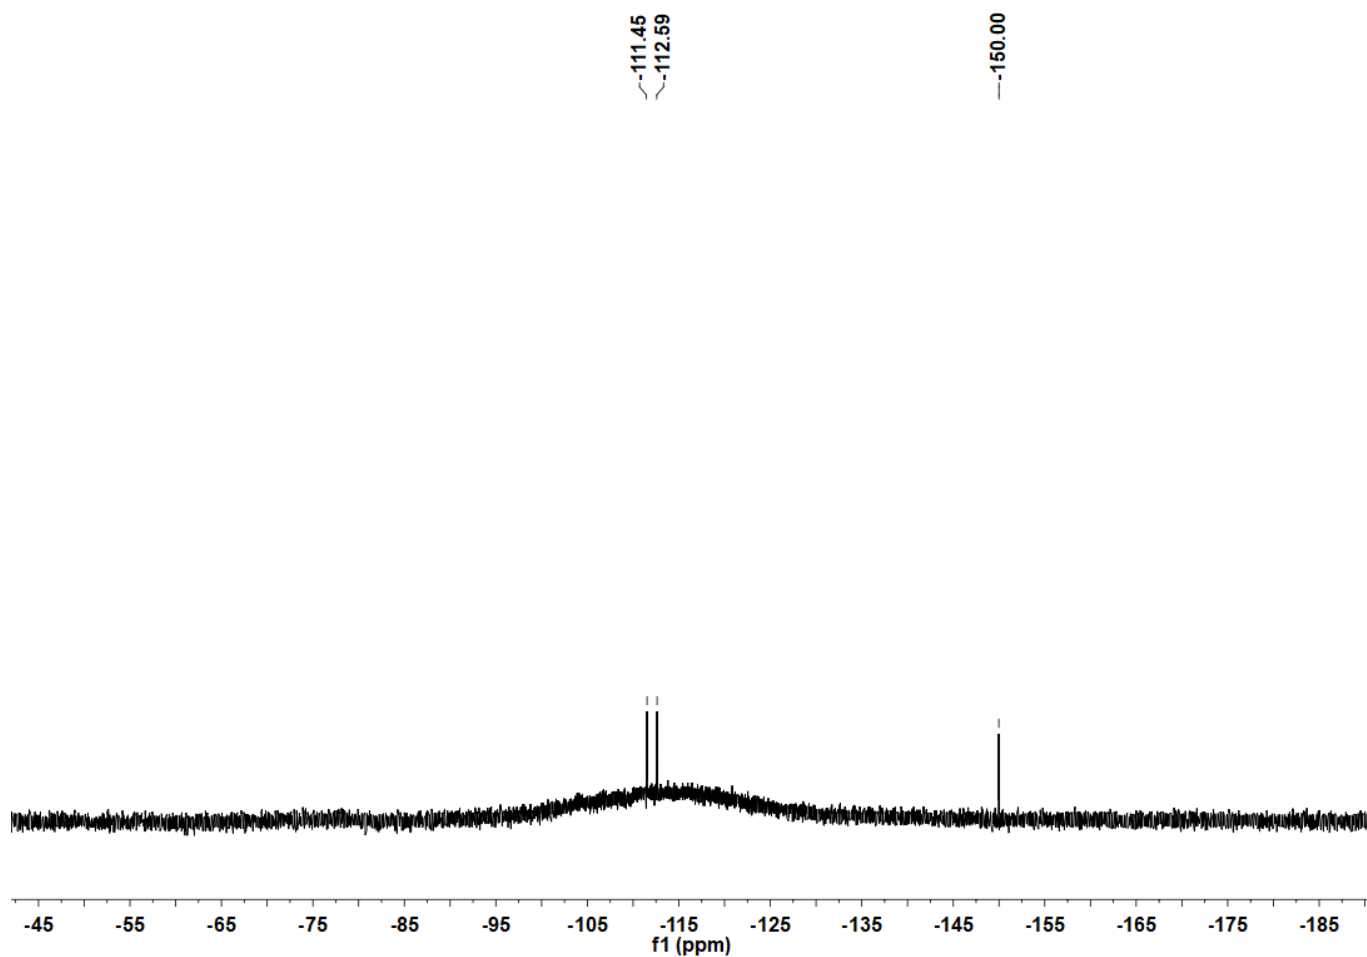

Figure S7.  $^{29}\text{Si}$  NMR spectrum for compound 3.

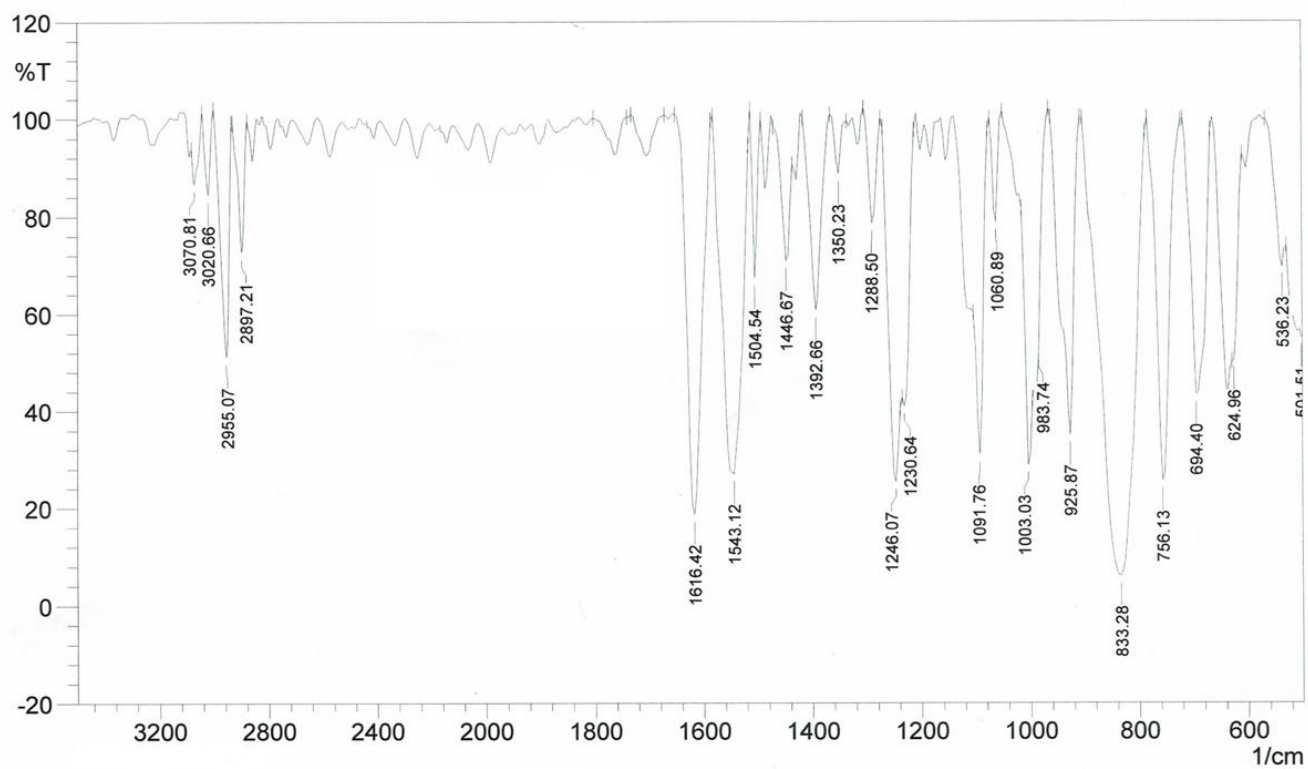

Figure S8. IR spectrum for compound 3.



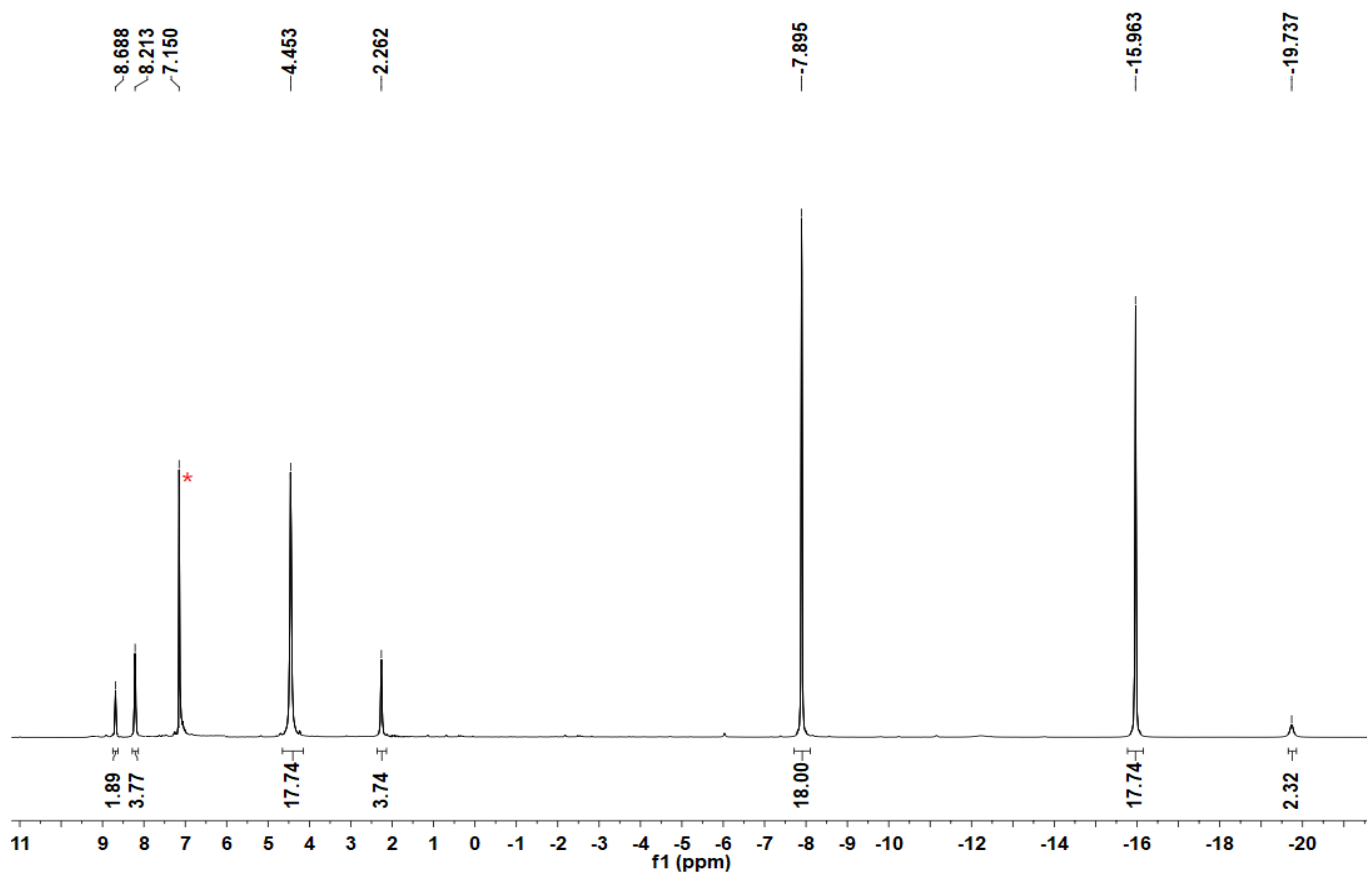

Figure S9.  $^1\text{H}$  NMR spectrum for compound 5.

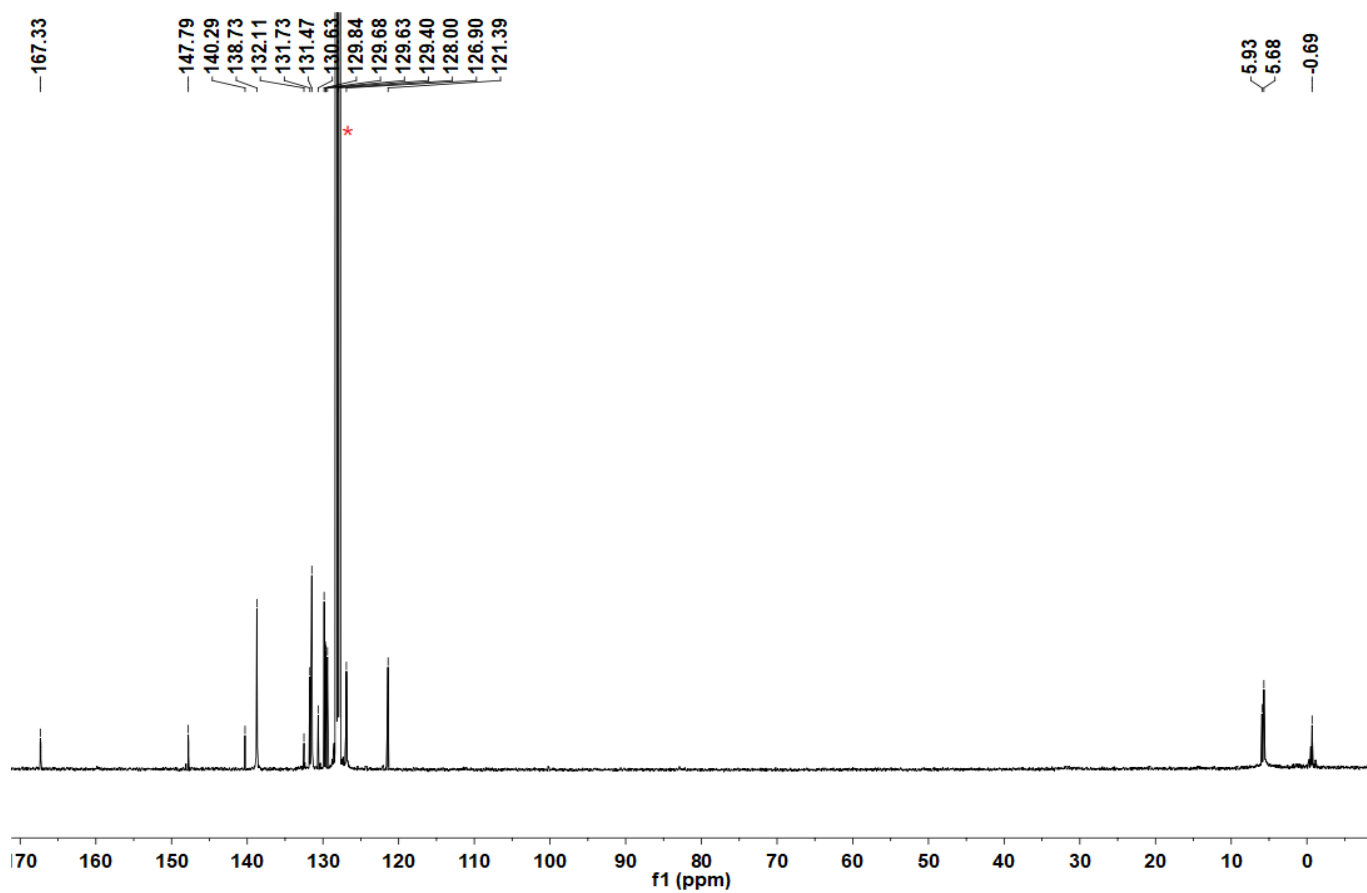

Figure S10.  $^{13}\text{C}$  NMR spectrum for compound 5.

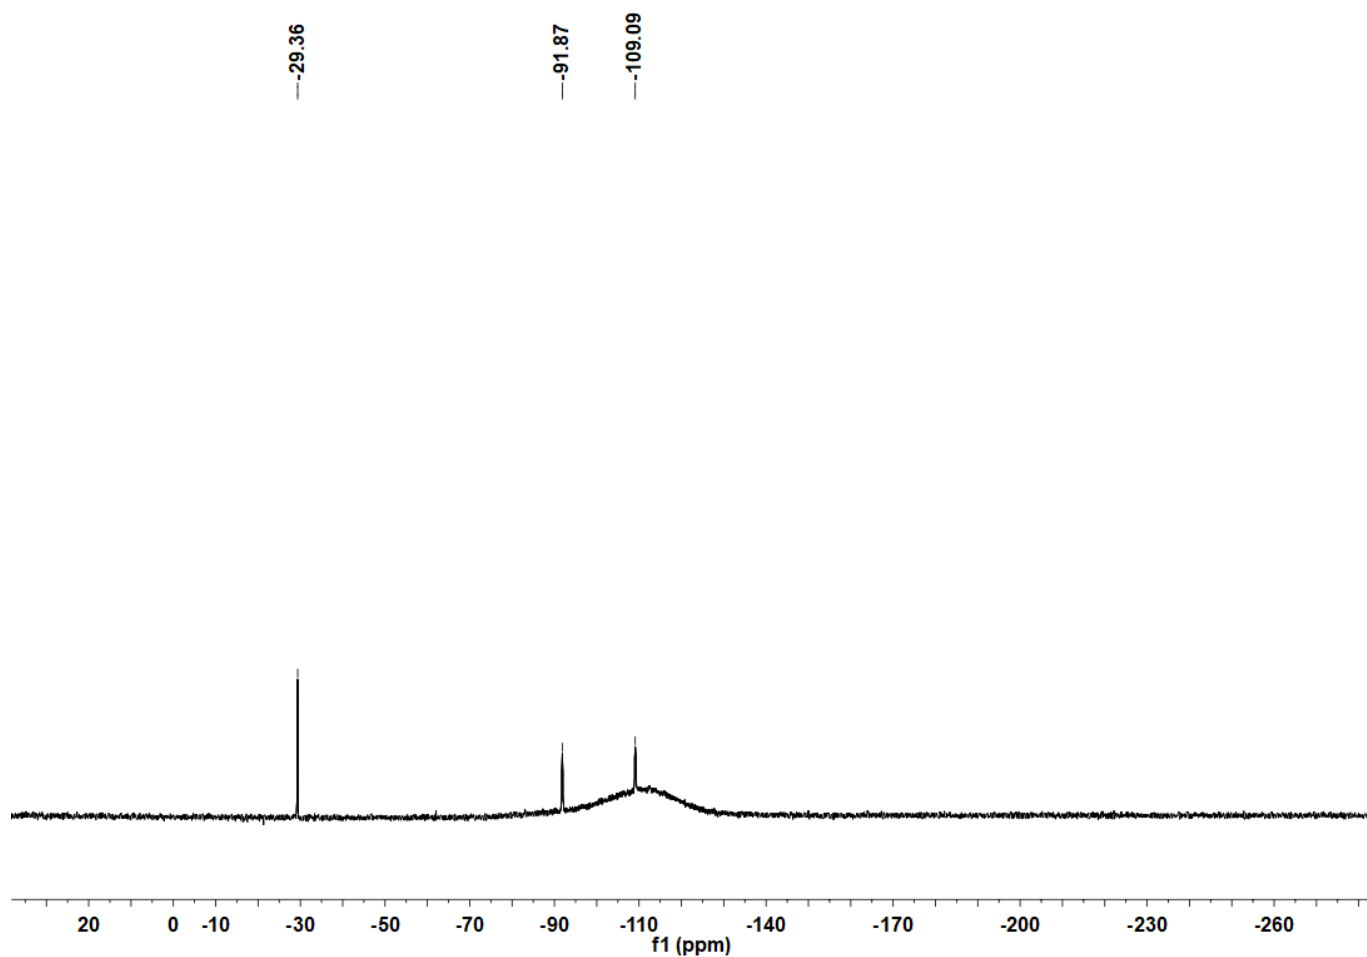

Figure S11.  $^{29}\text{Si}$  NMR spectrum for compound 5.

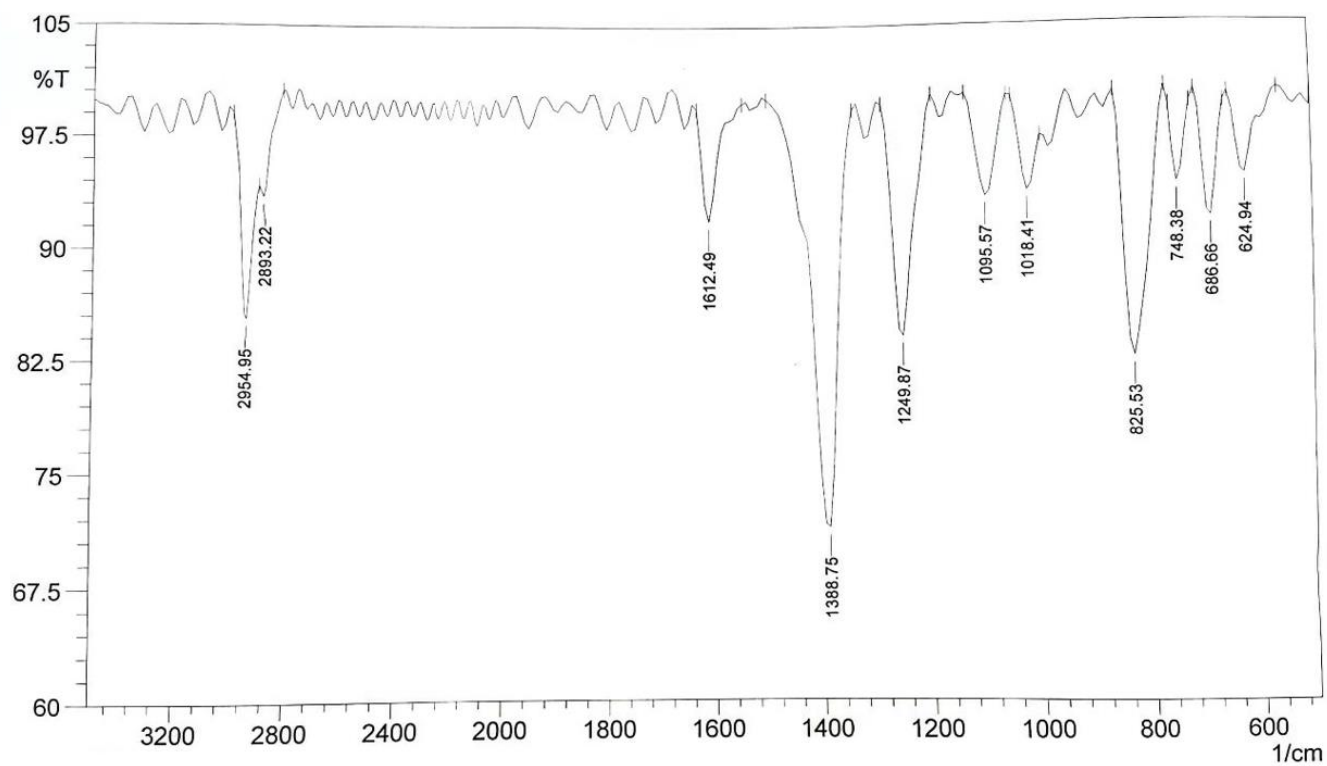

Figure S12. IR spectrum for compound 5.

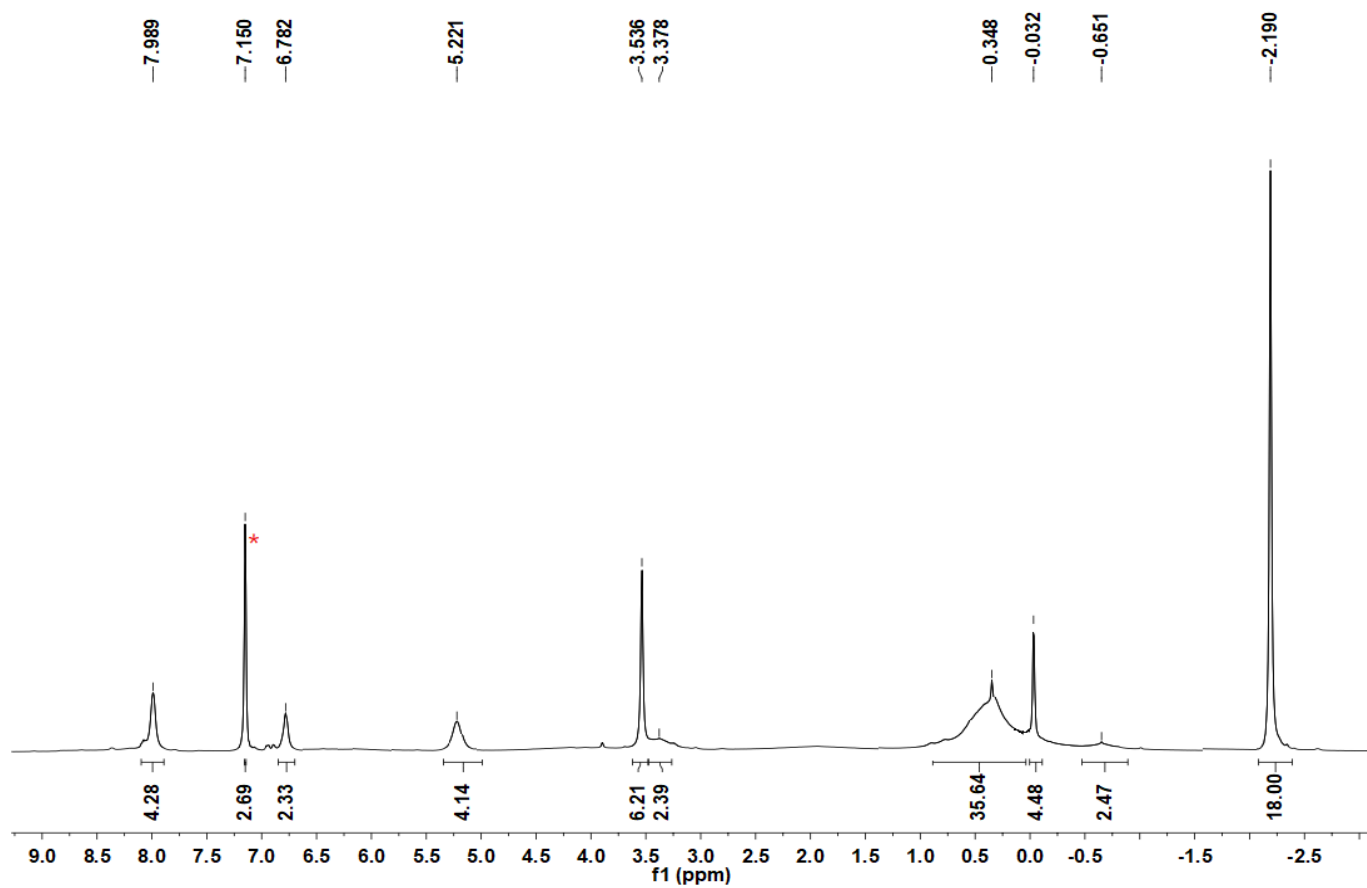

Figure S13.  $^1\text{H}$  NMR spectrum for compound 7.

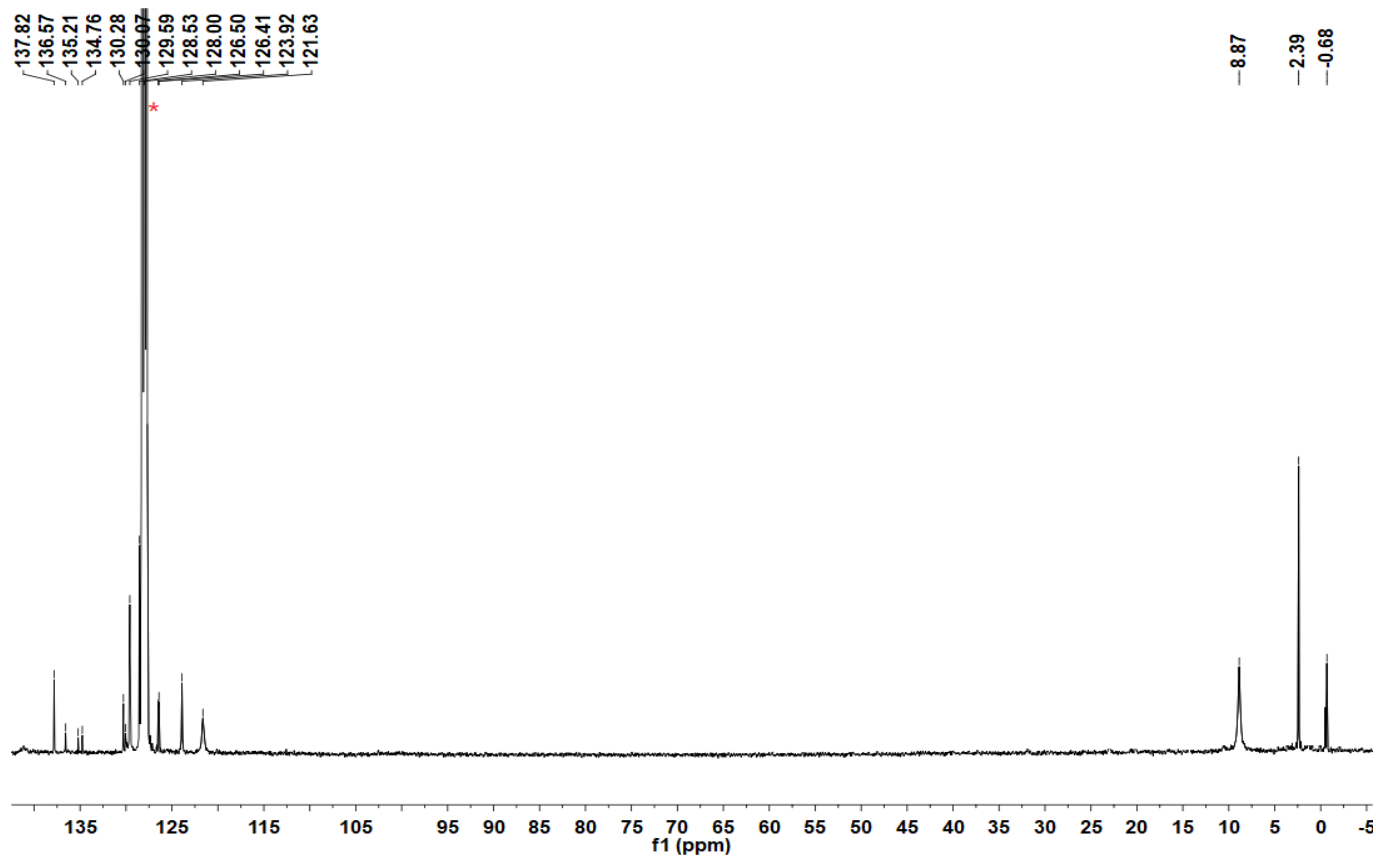

Figure S14.  $^{13}\text{C}$  NMR spectrum for compound 7.

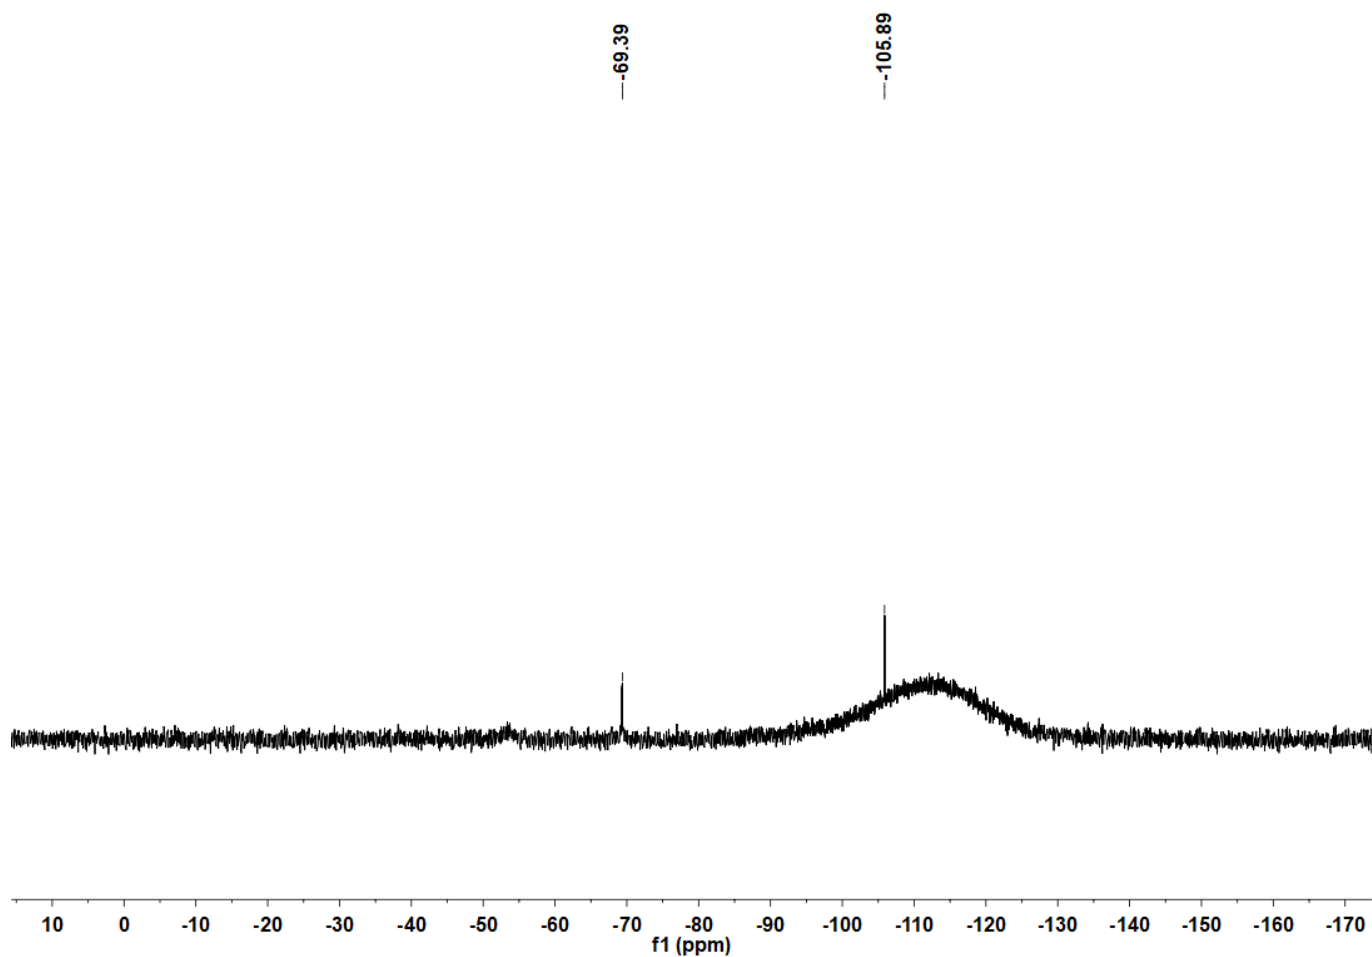

Figure S15.  $^{29}\text{Si}$  NMR spectrum for compound 7.

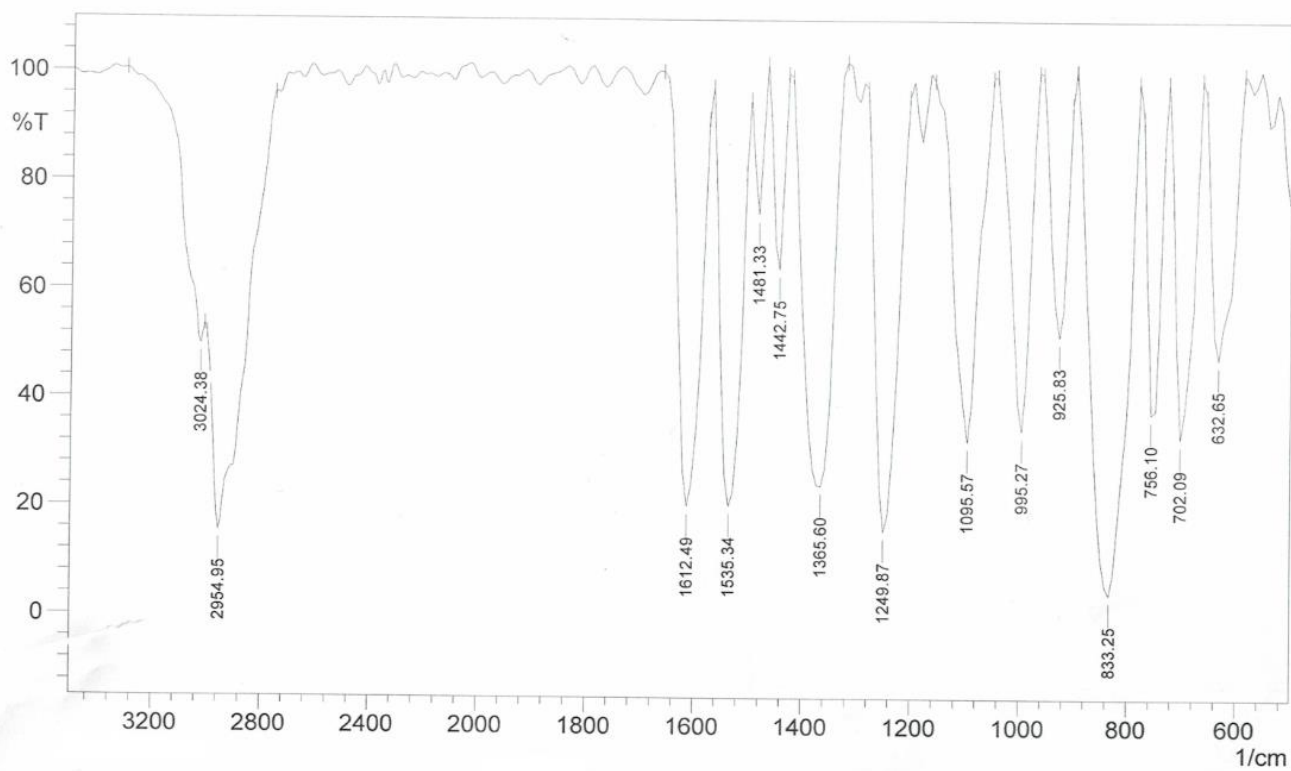

Figure S16. IR spectrum for compound 7.

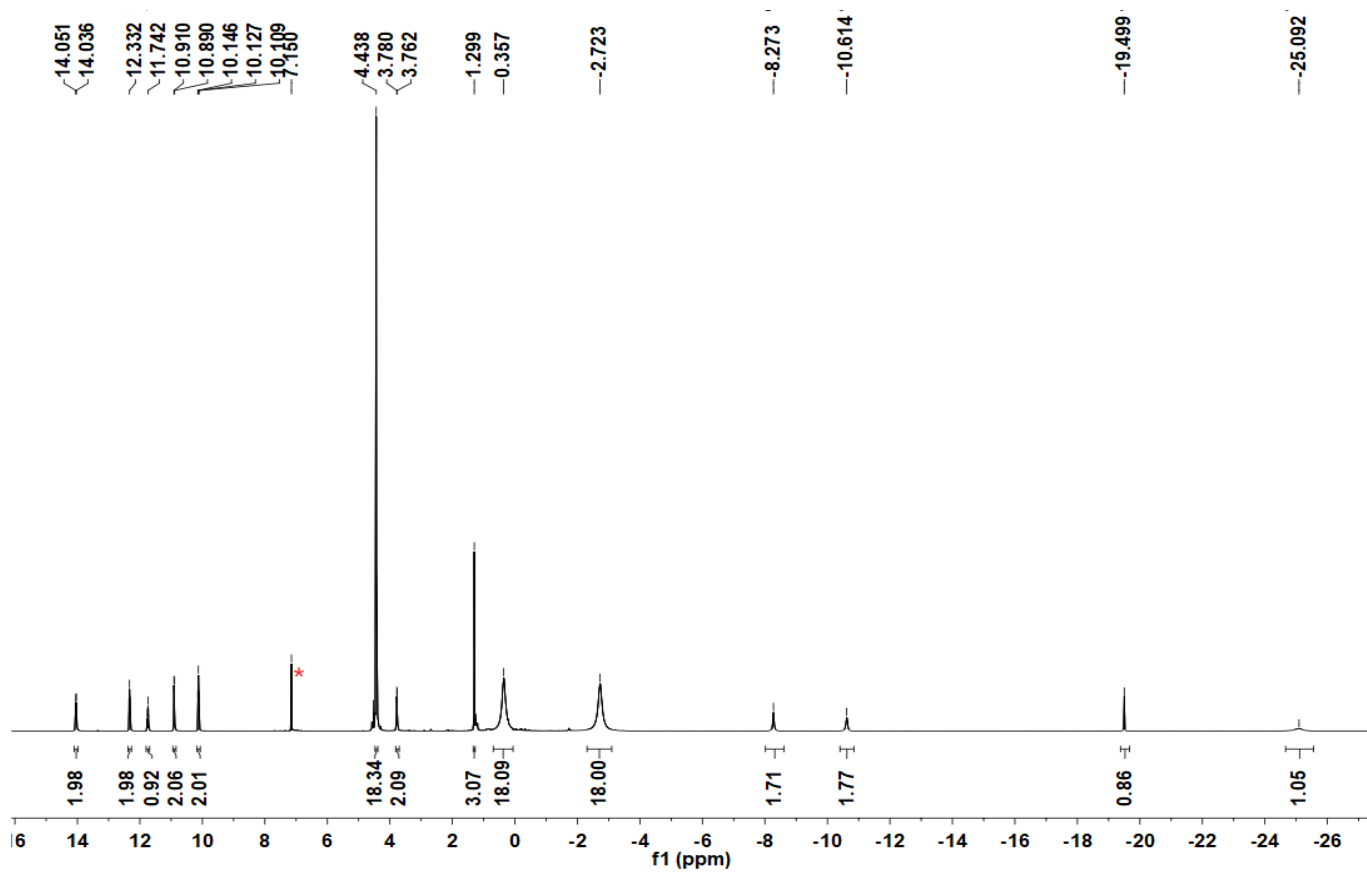

Figure S17. <sup>1</sup>H NMR spectrum for compound 8.

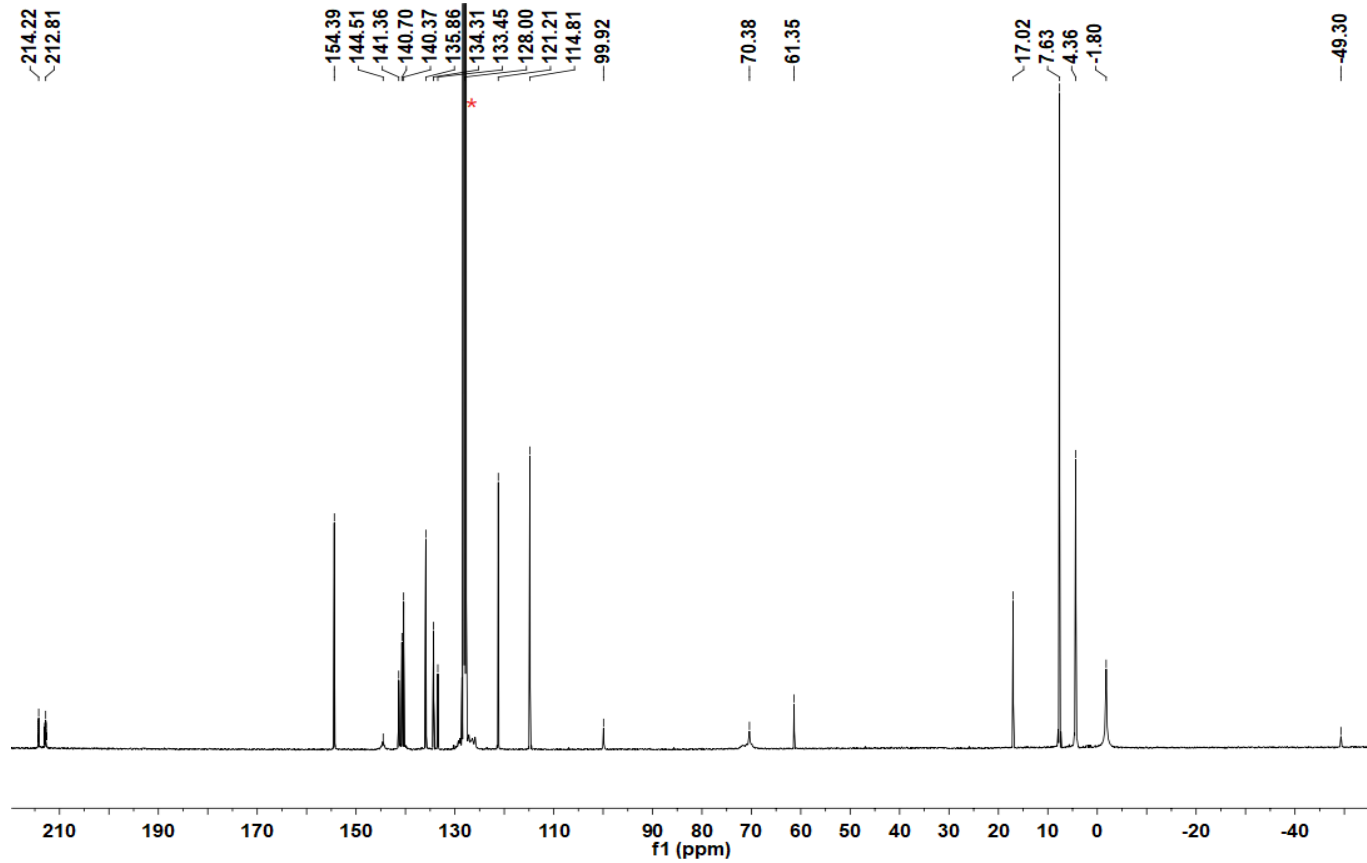

Figure S18. <sup>13</sup>C NMR spectrum for compound 8.

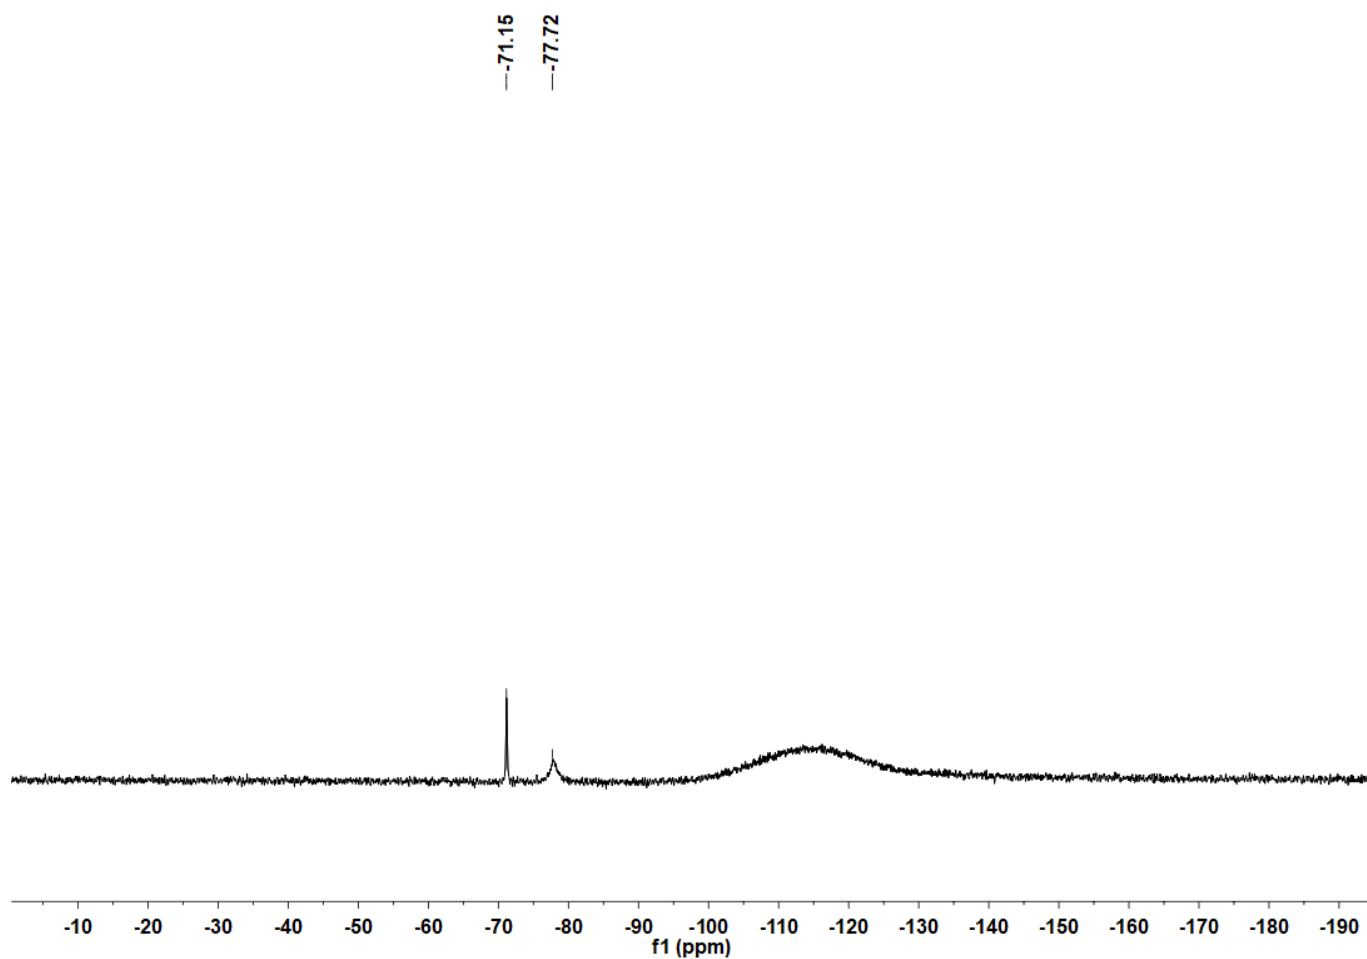

Figure S19.  $^{29}\text{Si}$  NMR spectrum for compound 8.

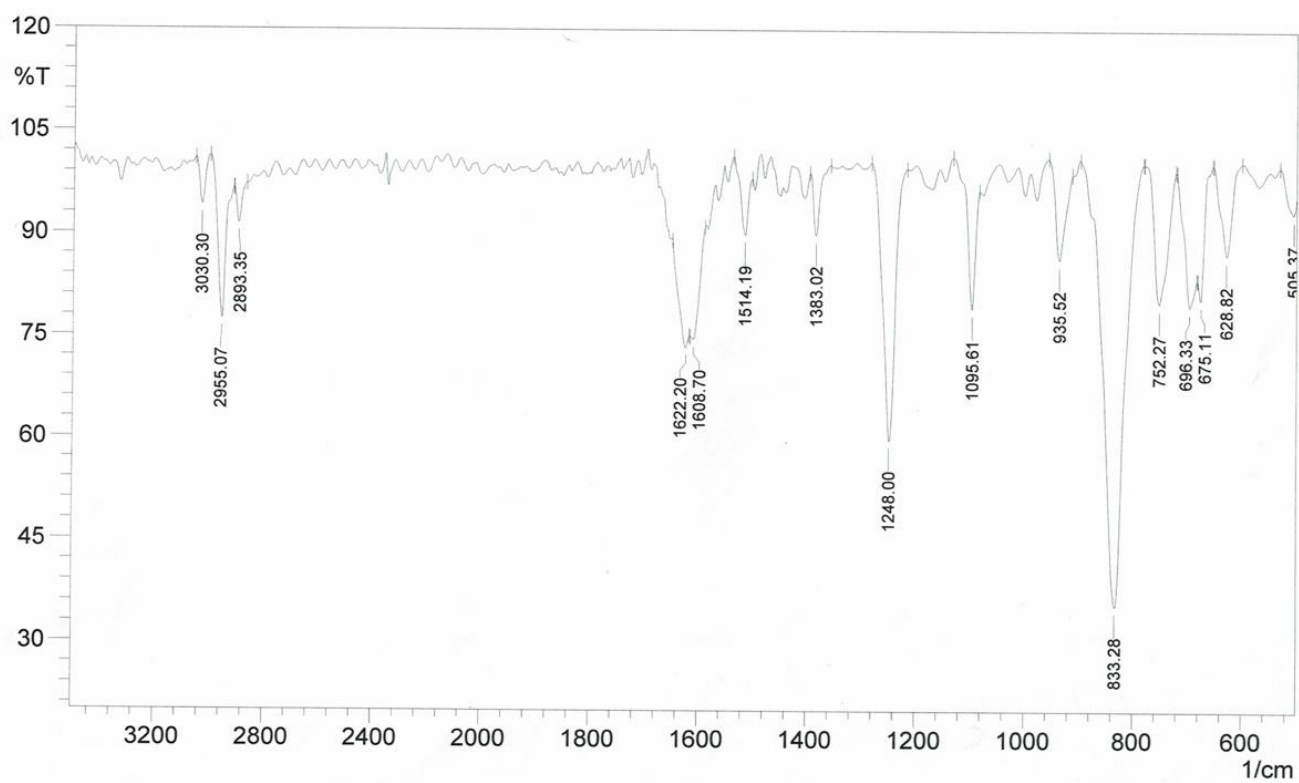

Figure S20. IR spectrum for compound 8.

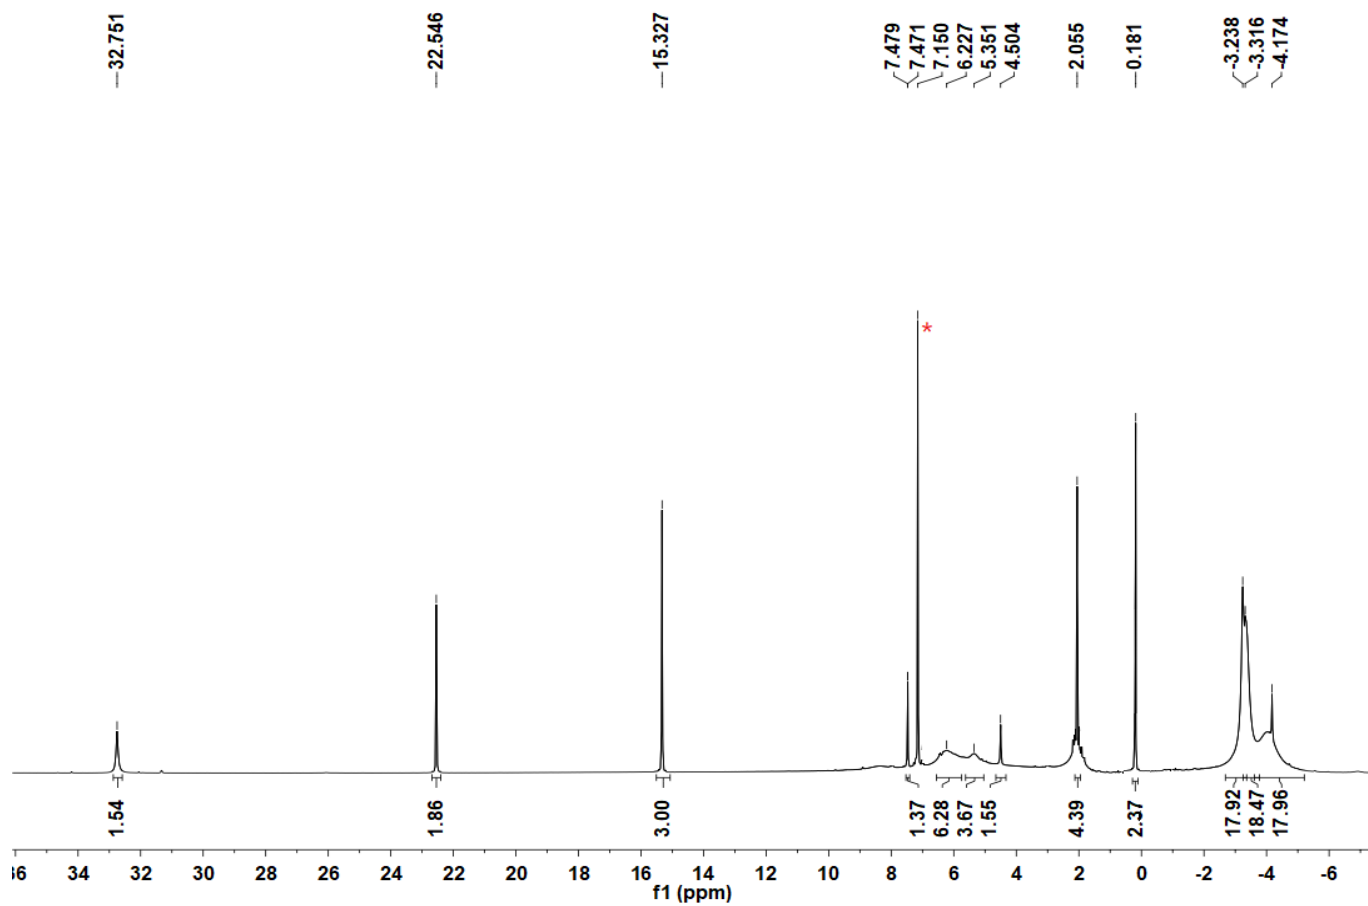

Figure S21.  $^1\text{H}$  NMR spectrum for compound **9**.

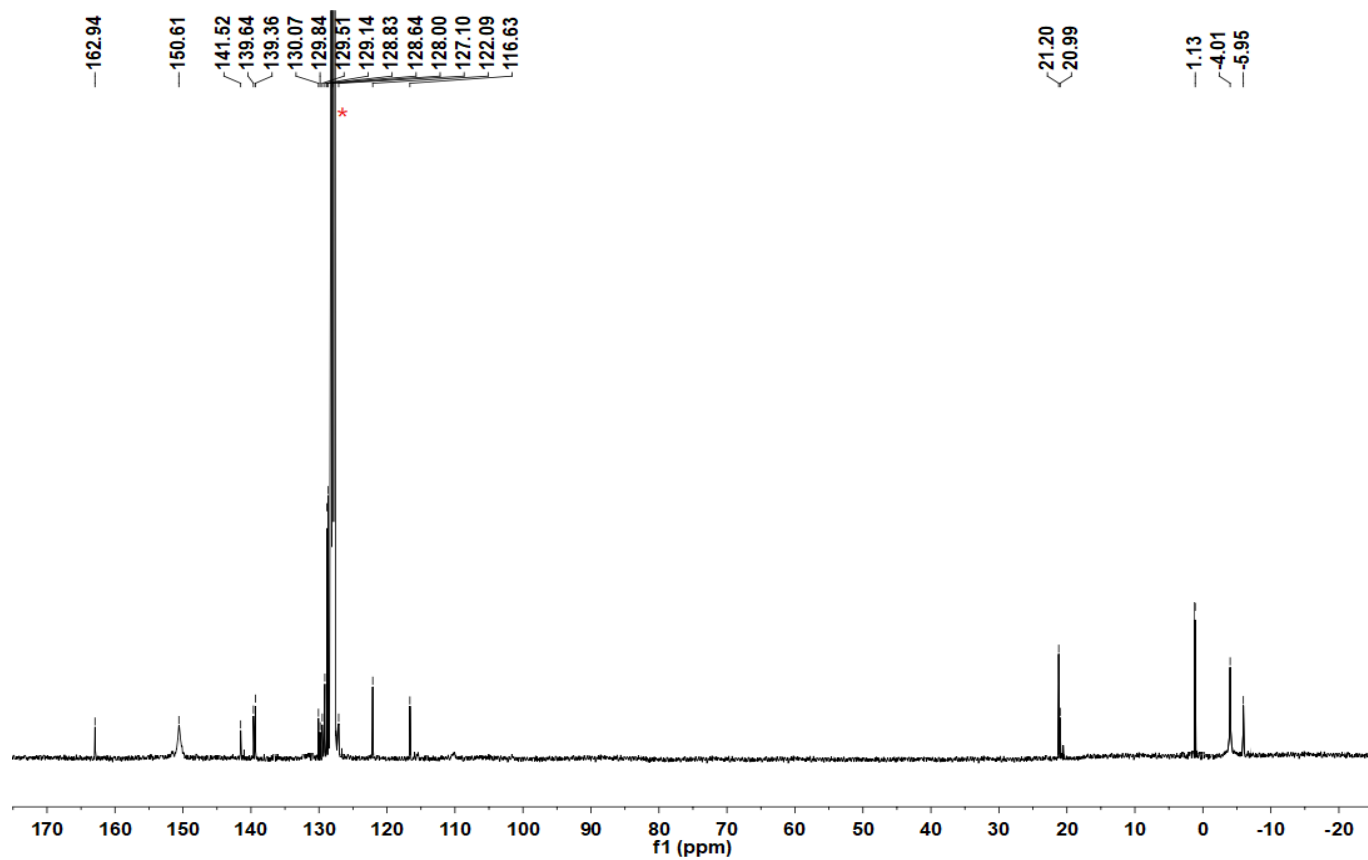

Figure S22.  $^{13}\text{C}$  NMR spectrum for compound **9**.

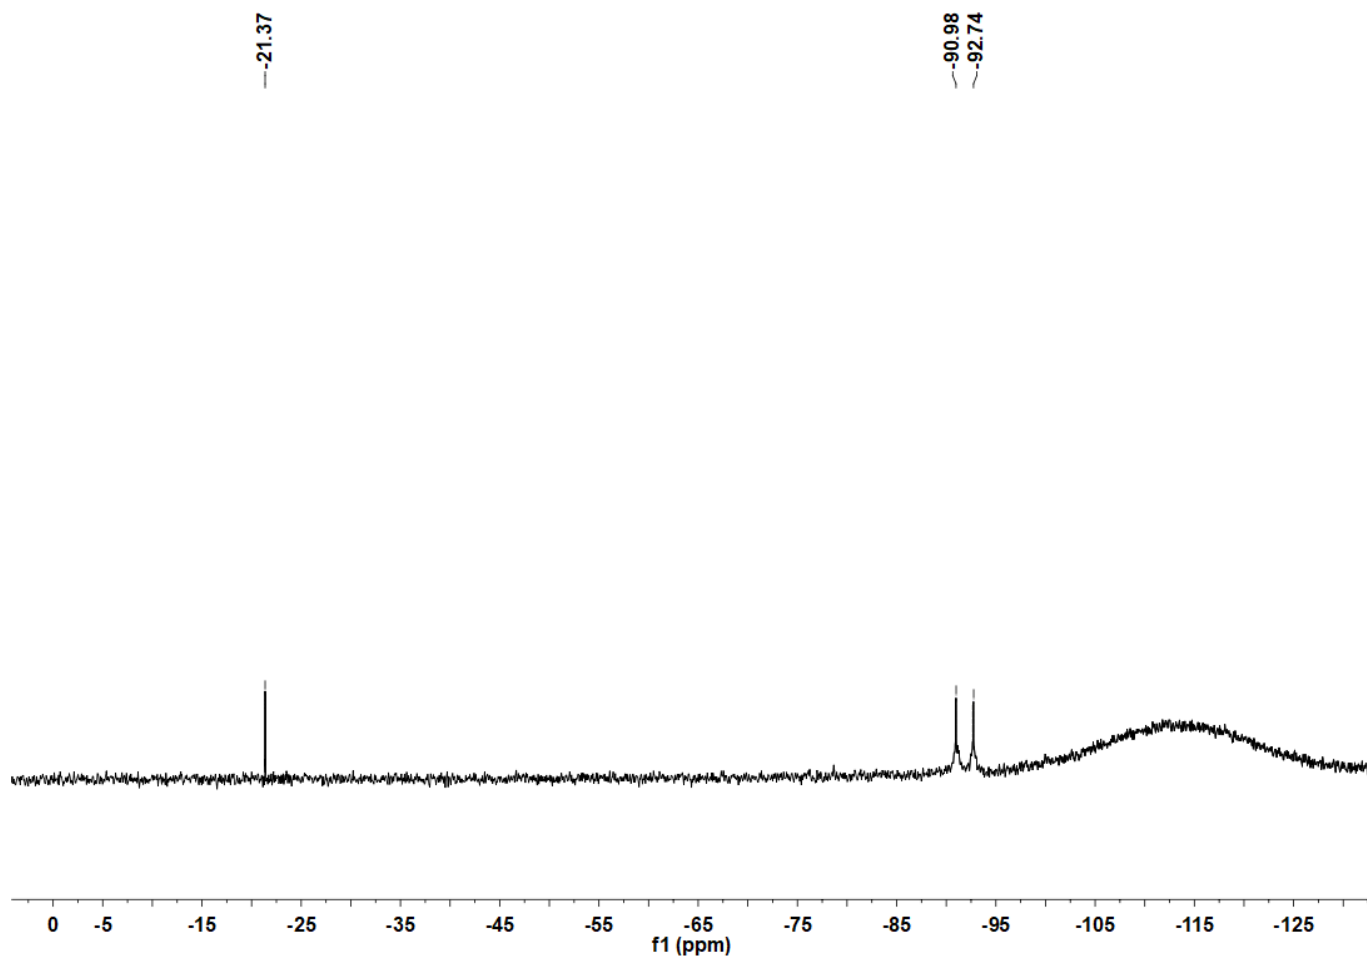

Figure S23.  $^{29}\text{Si}$  NMR spectrum for compound 9.

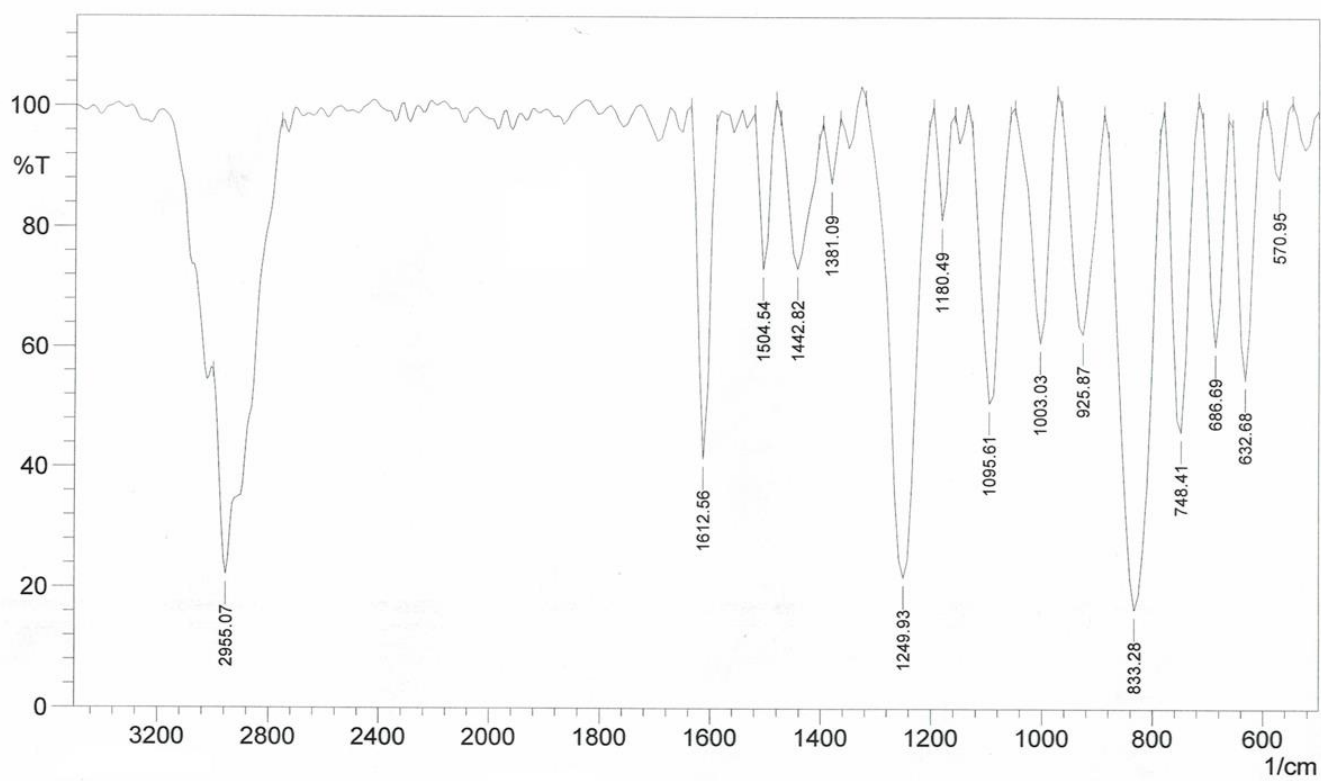

Figure S24. IR spectrum for compound 9.



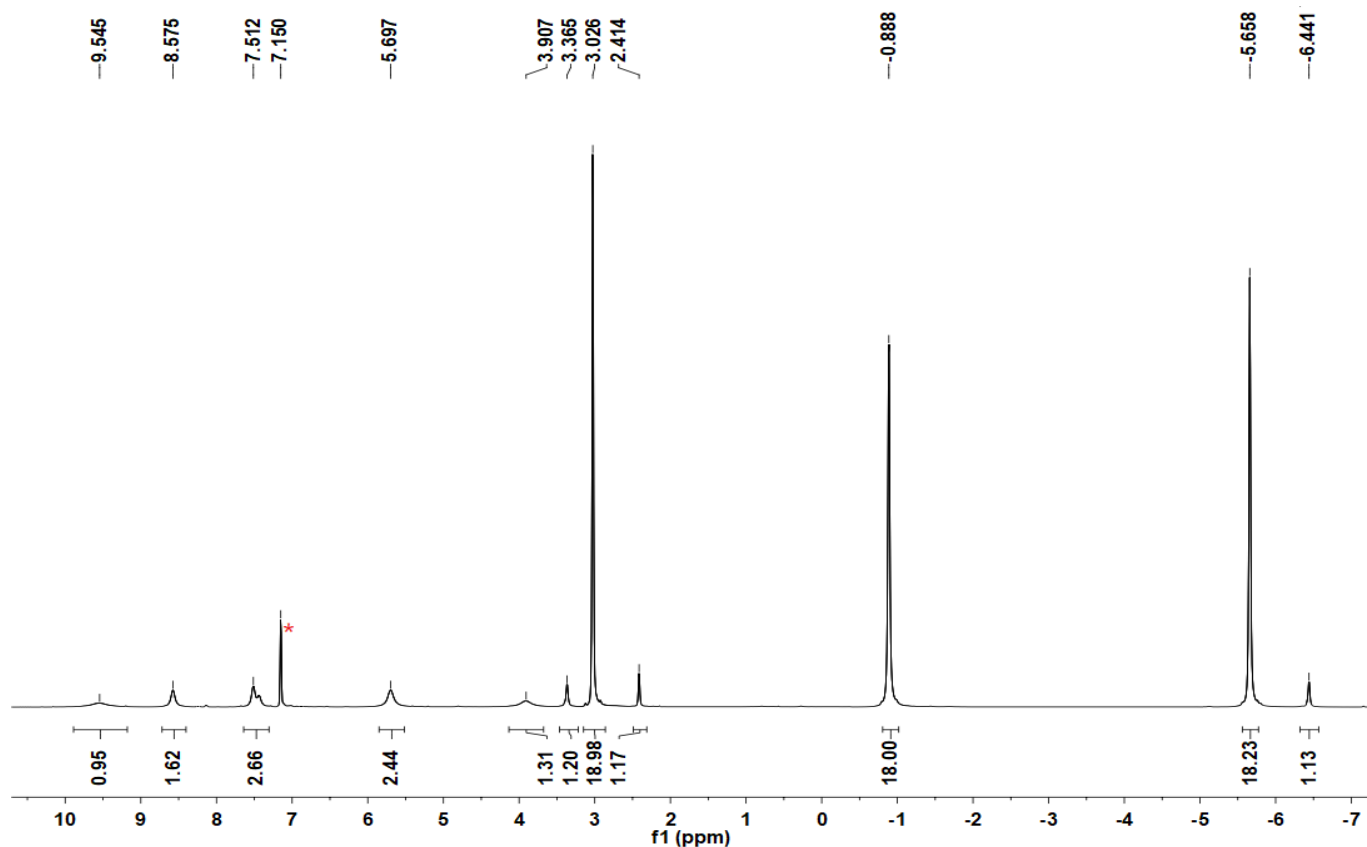

Figure S25. <sup>1</sup>H NMR spectrum for compound 10.

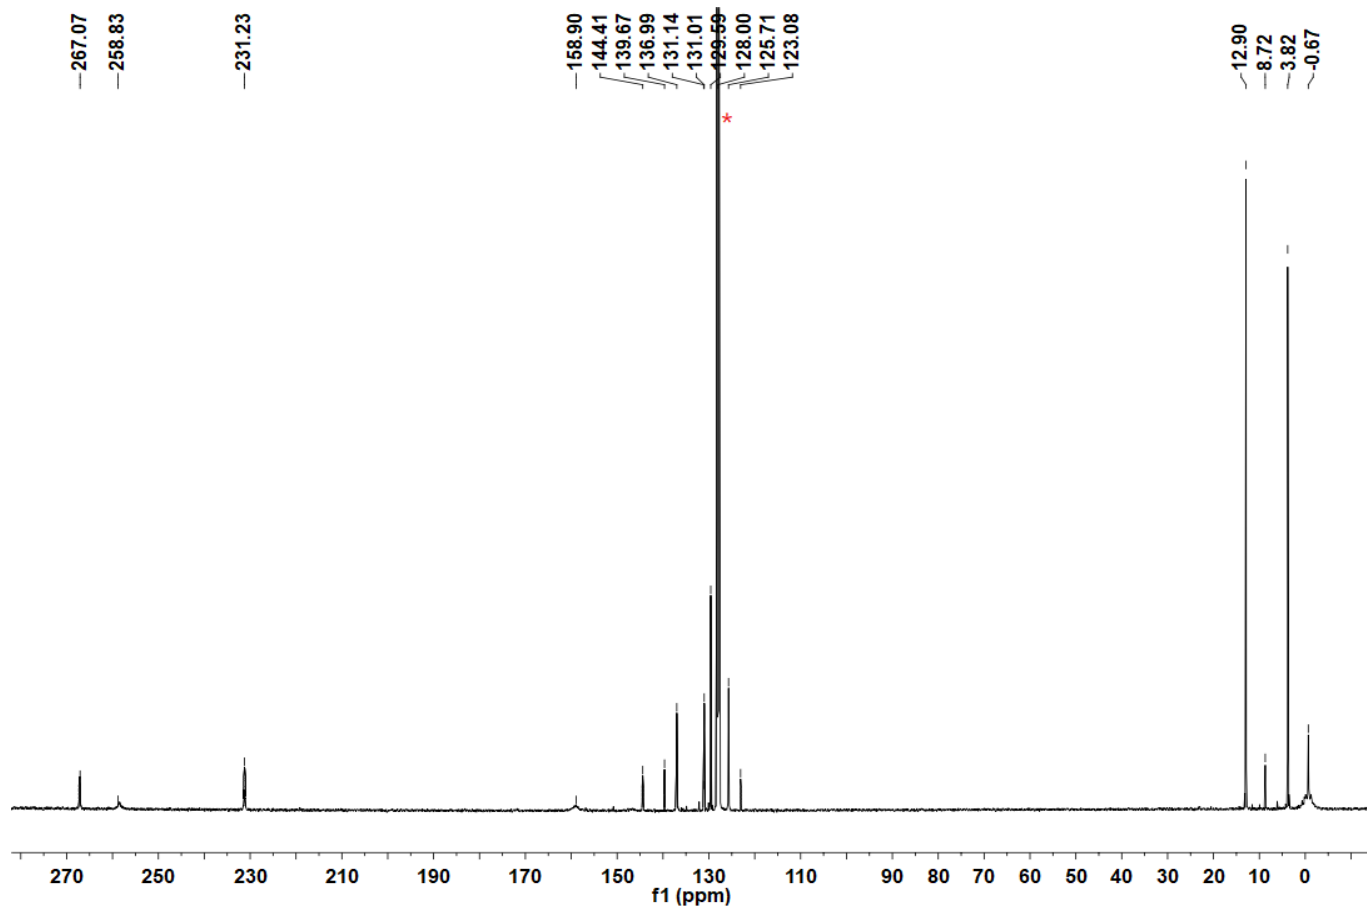

Figure S26. <sup>13</sup>C NMR spectrum for compound 10.

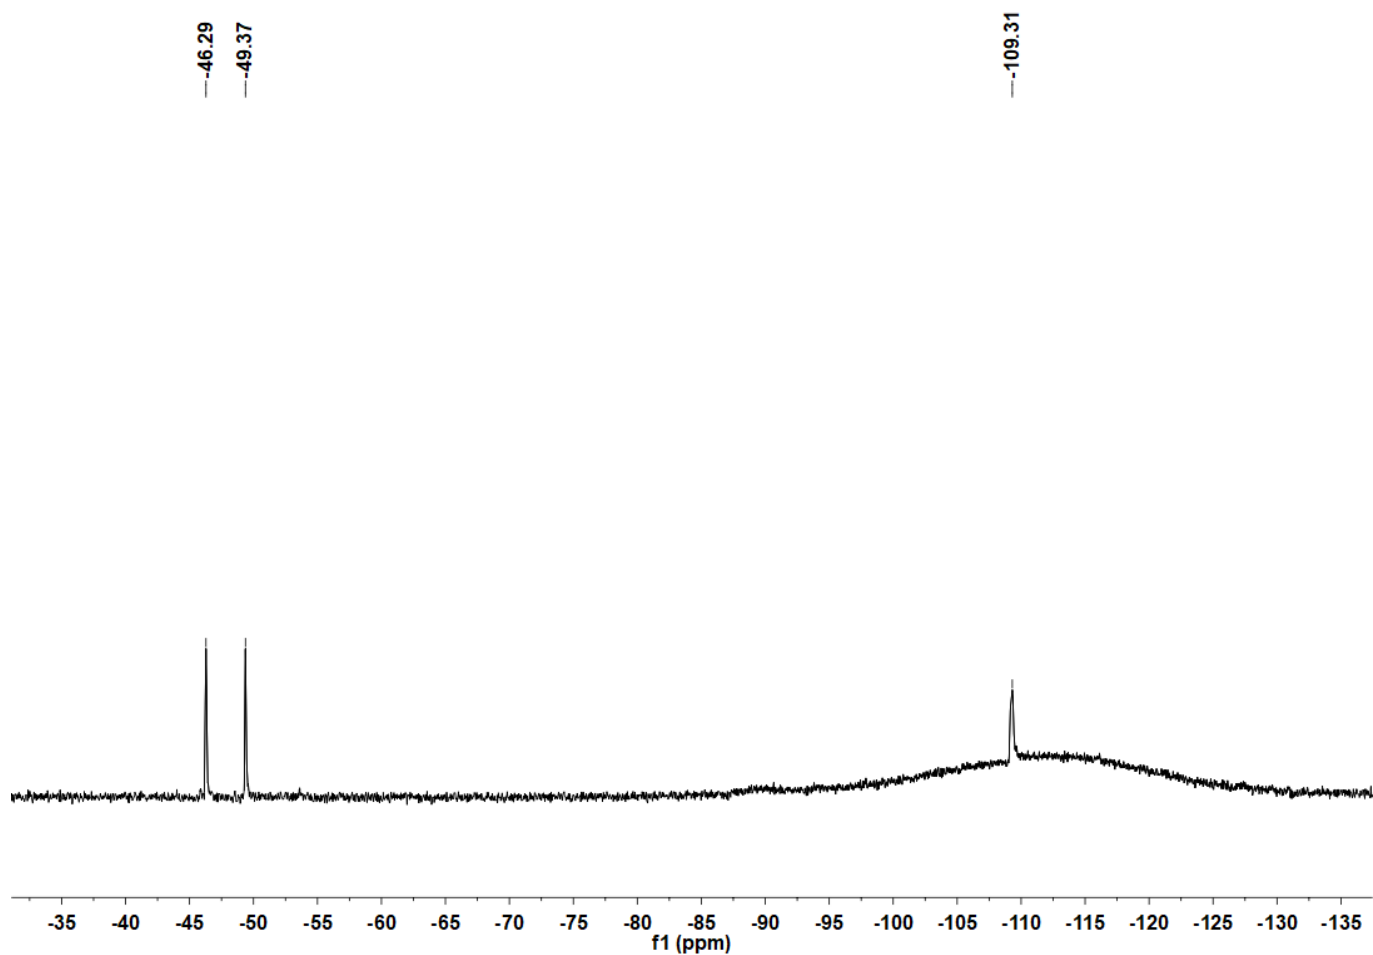

Figure S27.  $^{29}\text{Si}$  NMR spectrum for compound **10**.

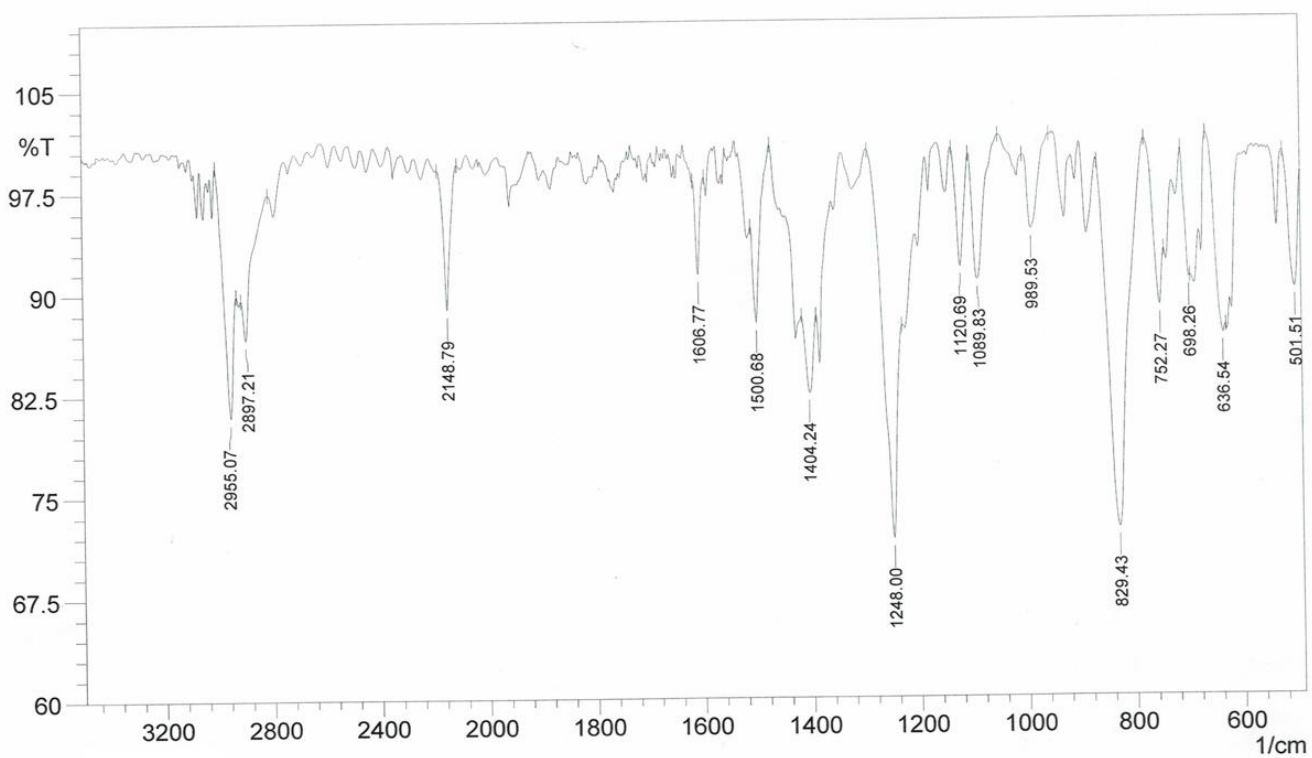

Figure S28. IR spectrum for compound **10**.

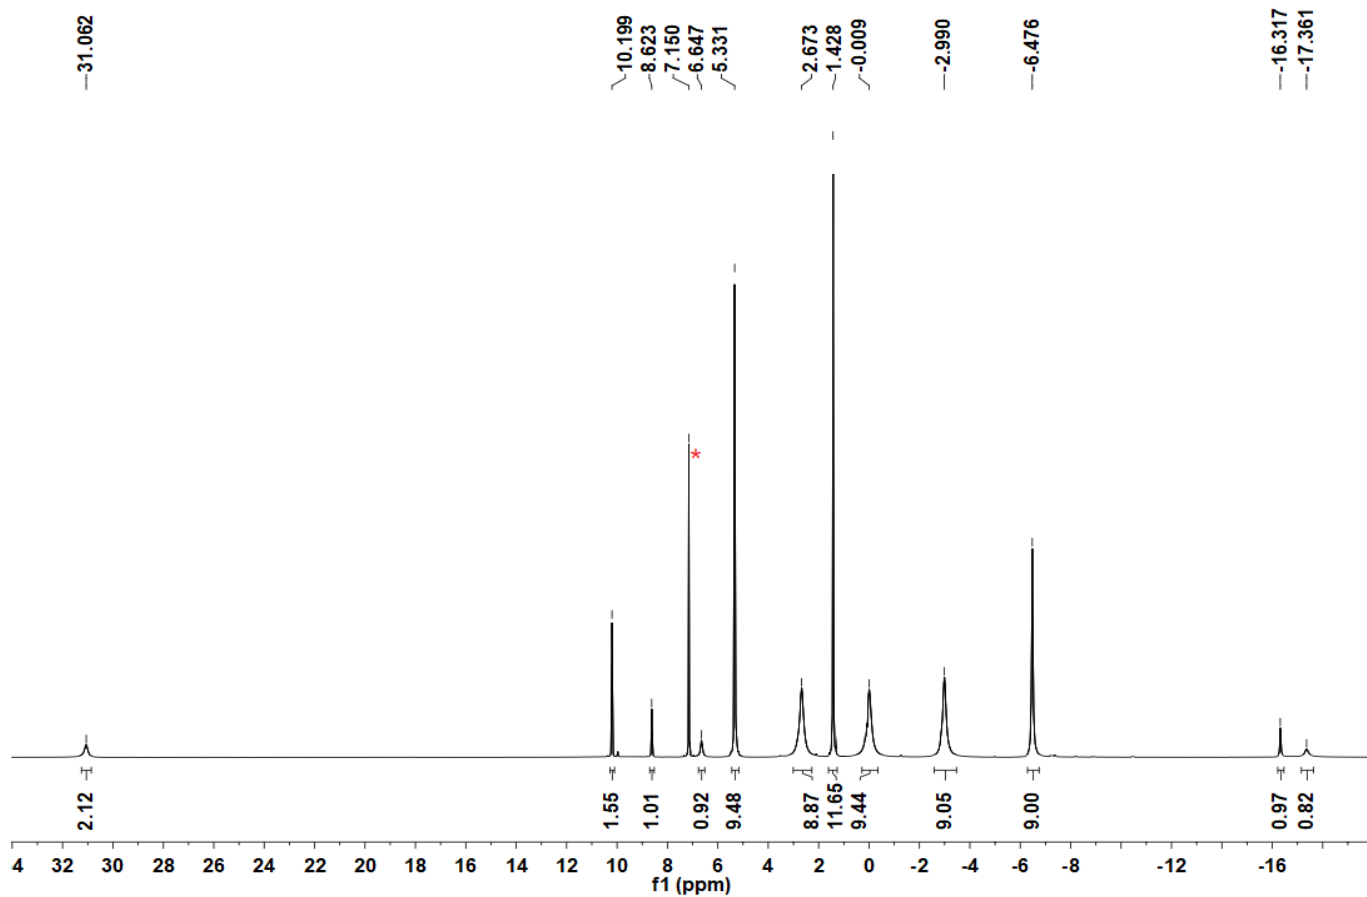

Figure S29.  $^1\text{H}$  NMR spectrum for compound **11**.

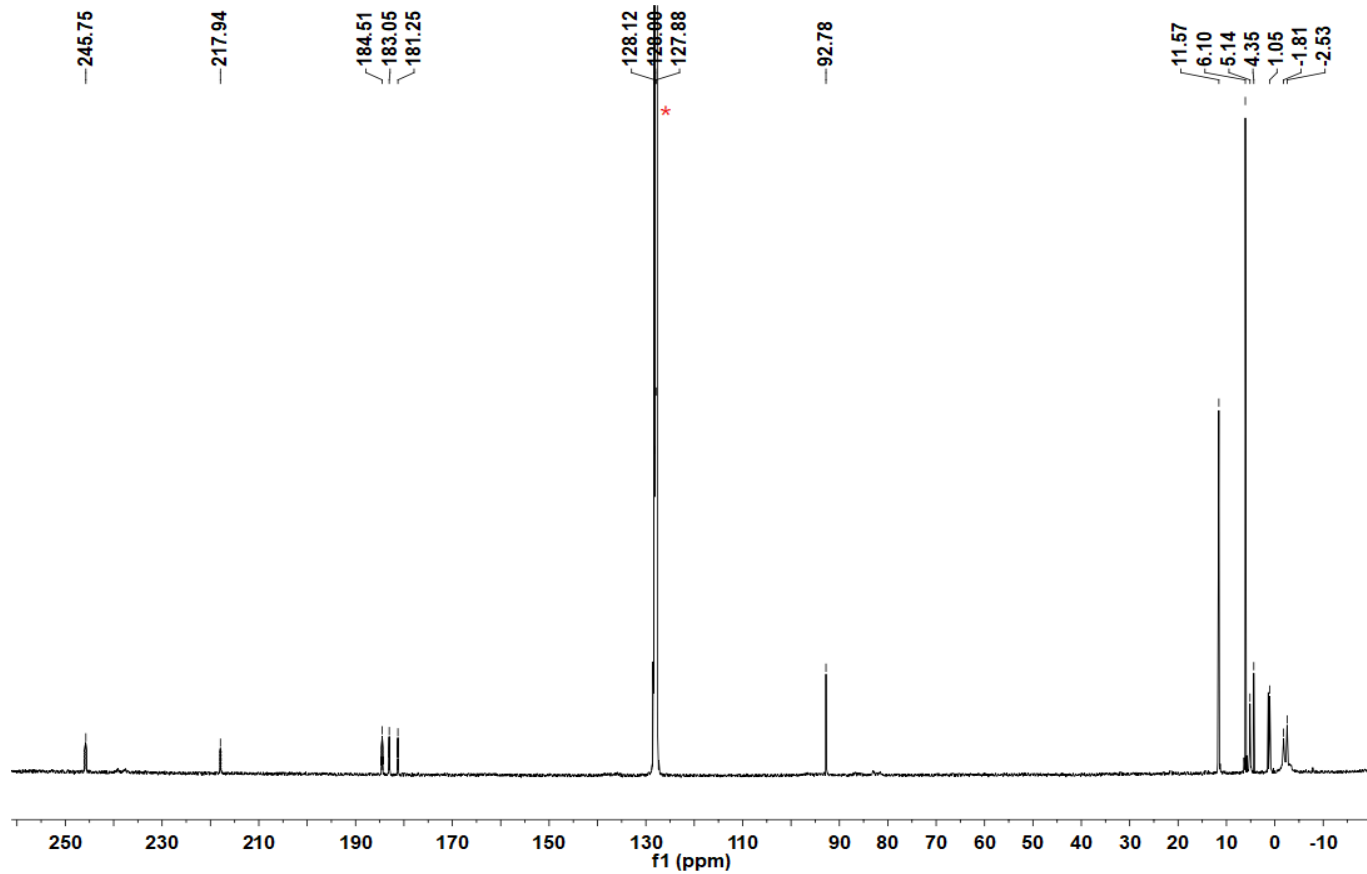

Figure S30.  $^{13}\text{C}$  NMR spectrum for compound **11**.

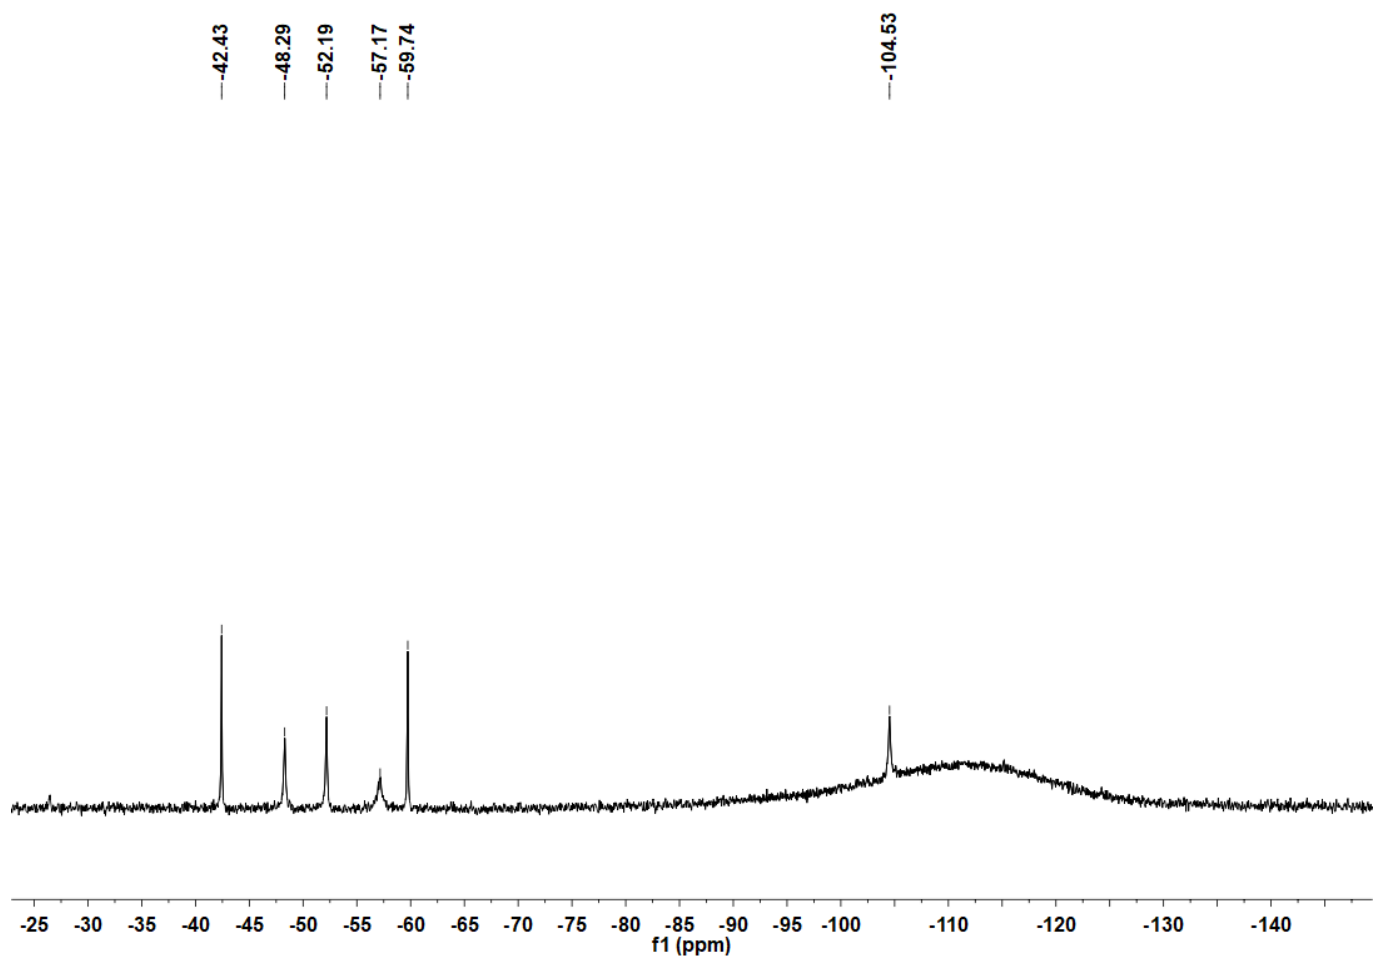

Figure S31.  $^{29}\text{Si}$  NMR spectrum for compound **11**.

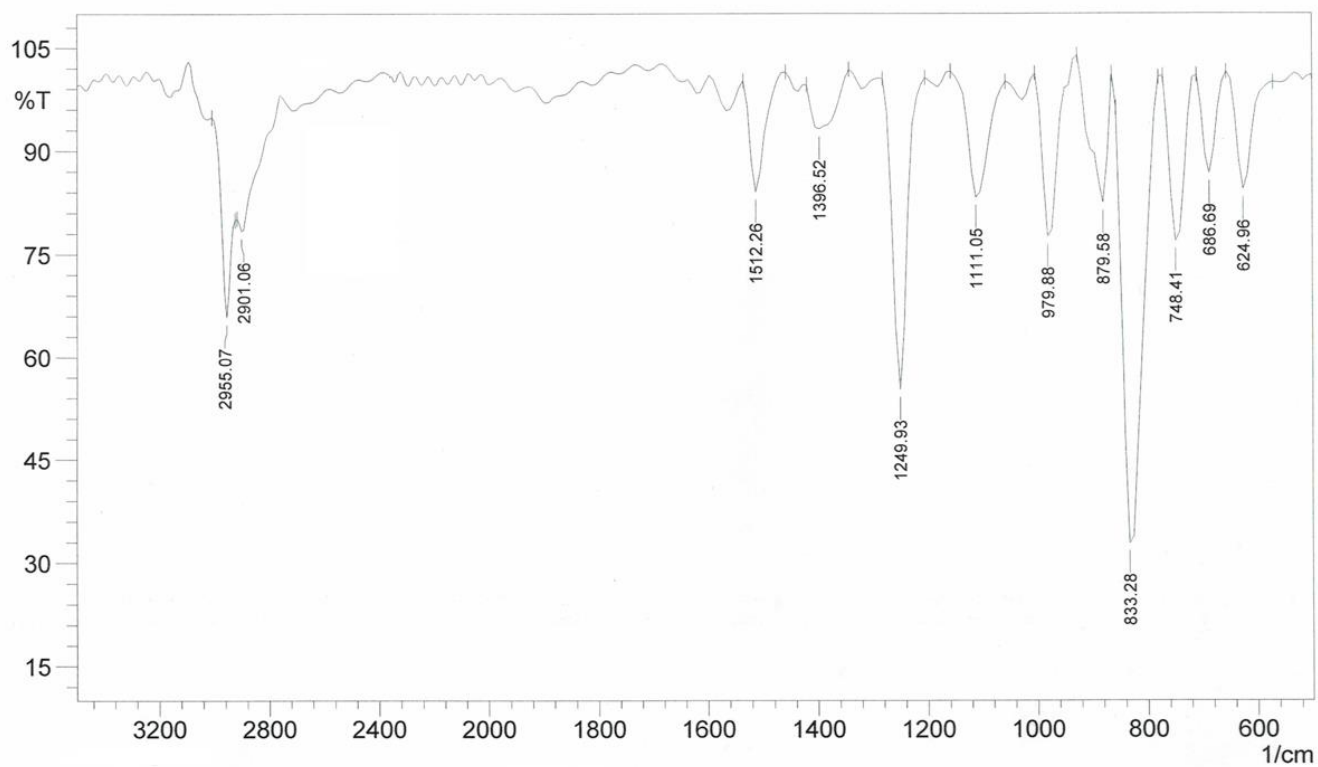

Figure S32. IR spectrum for compound **11**.

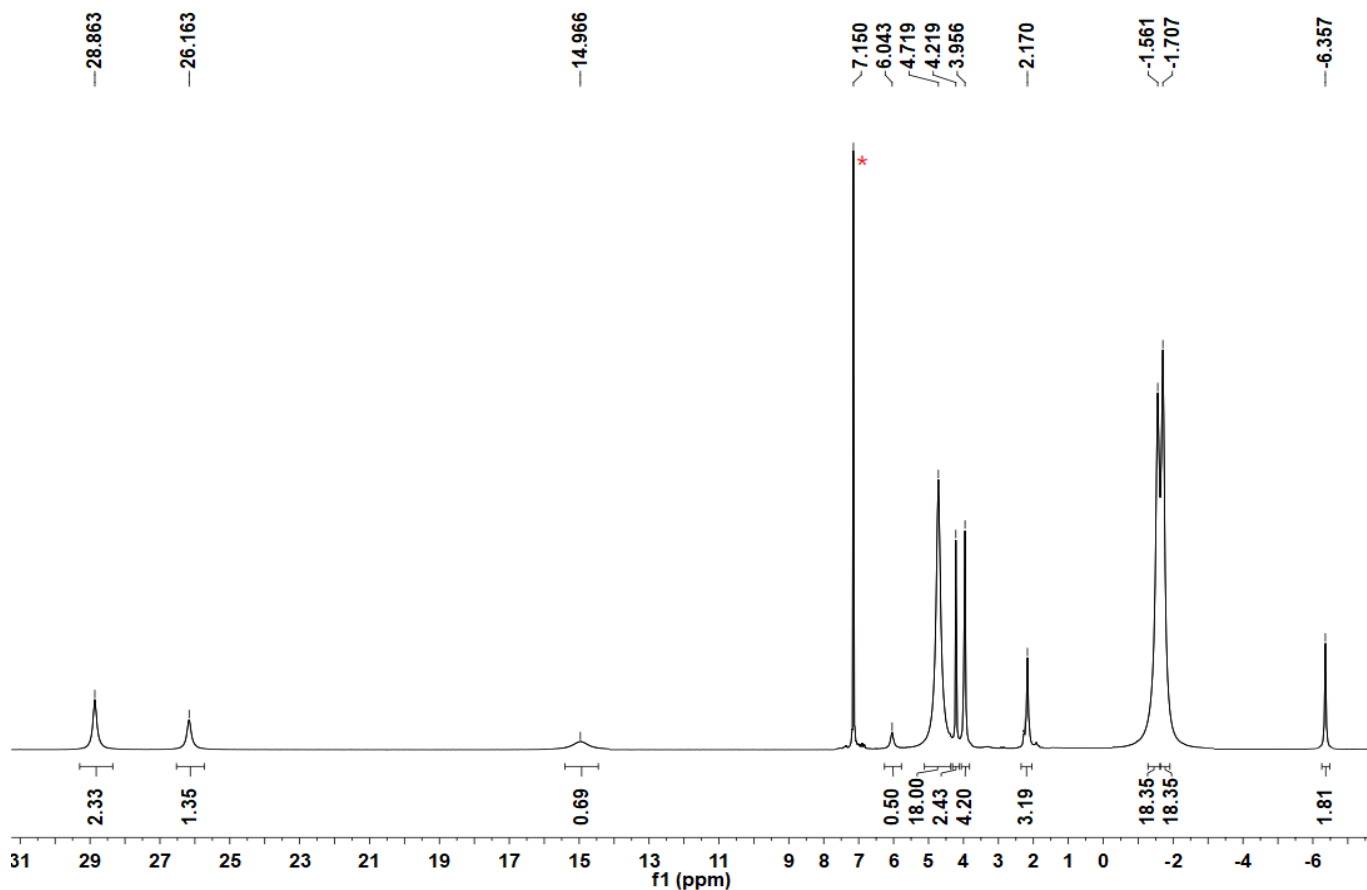

Figure S33.  $^1\text{H}$  NMR spectrum for compound **12**.

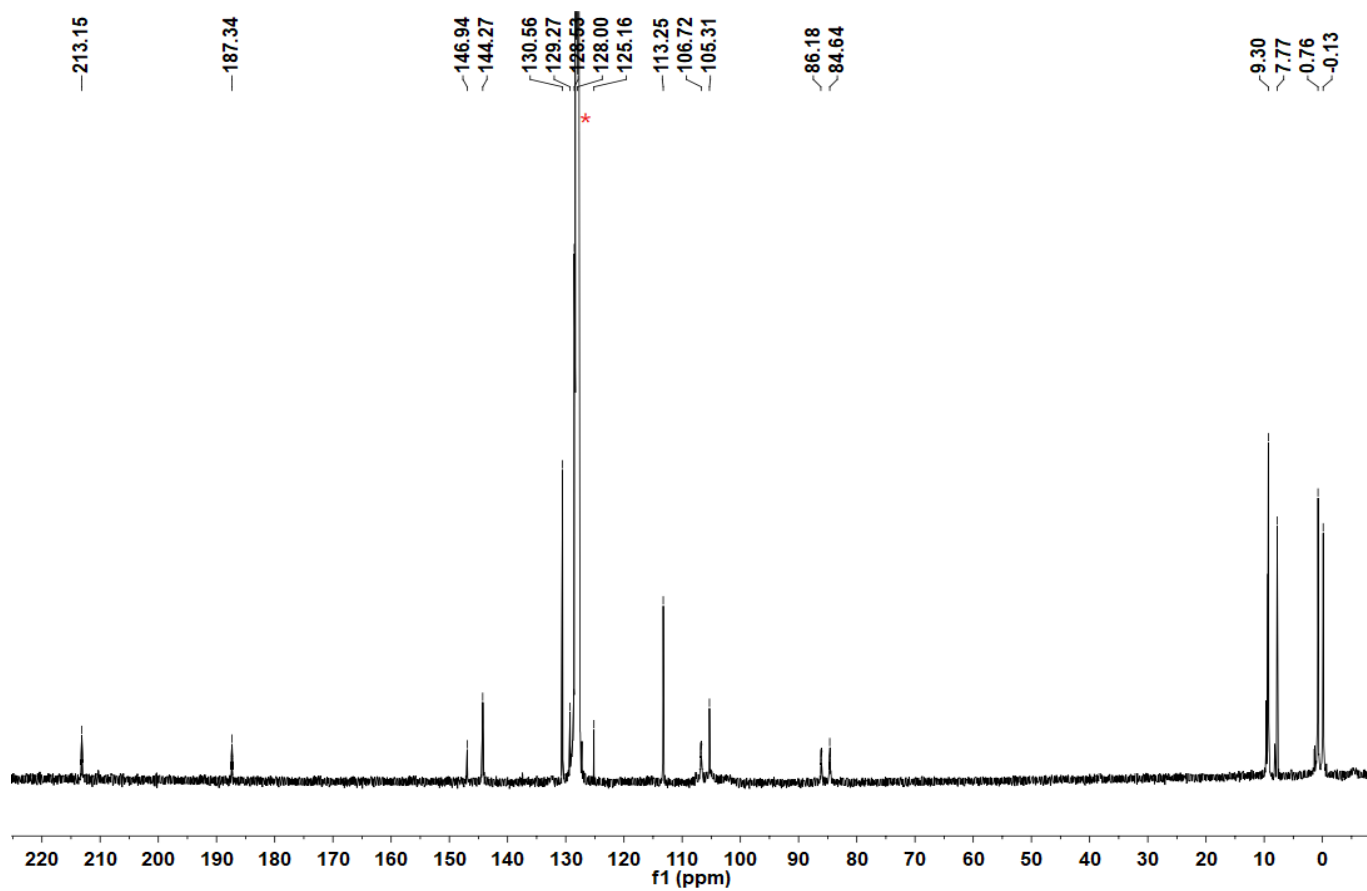

Figure S34.  $^{13}\text{C}$  NMR spectrum for compound **12**.

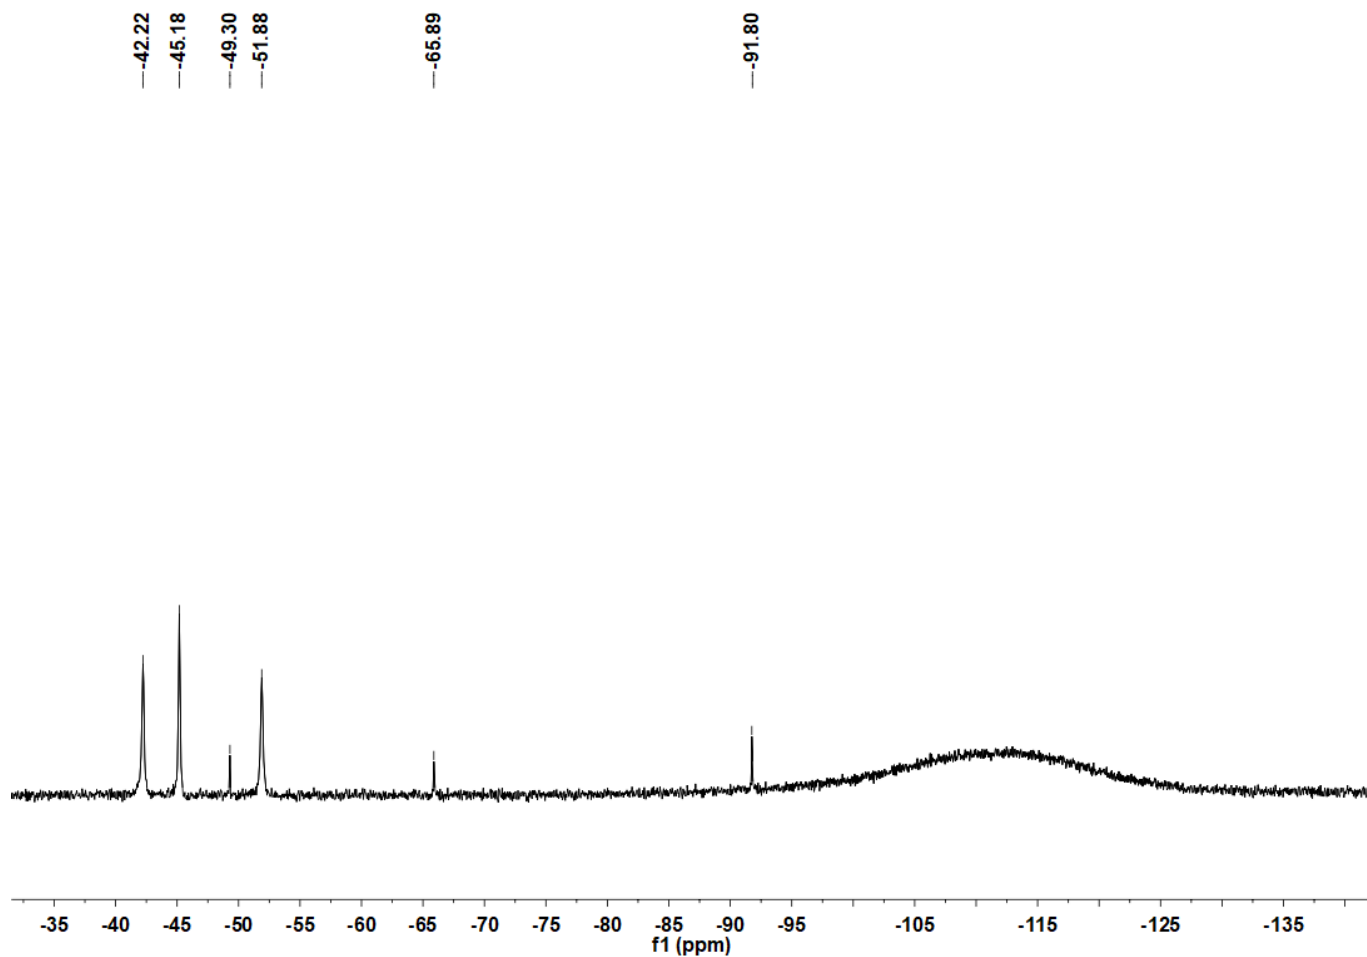

Figure S35.  $^{29}\text{Si}$  NMR spectrum for compound **12**.

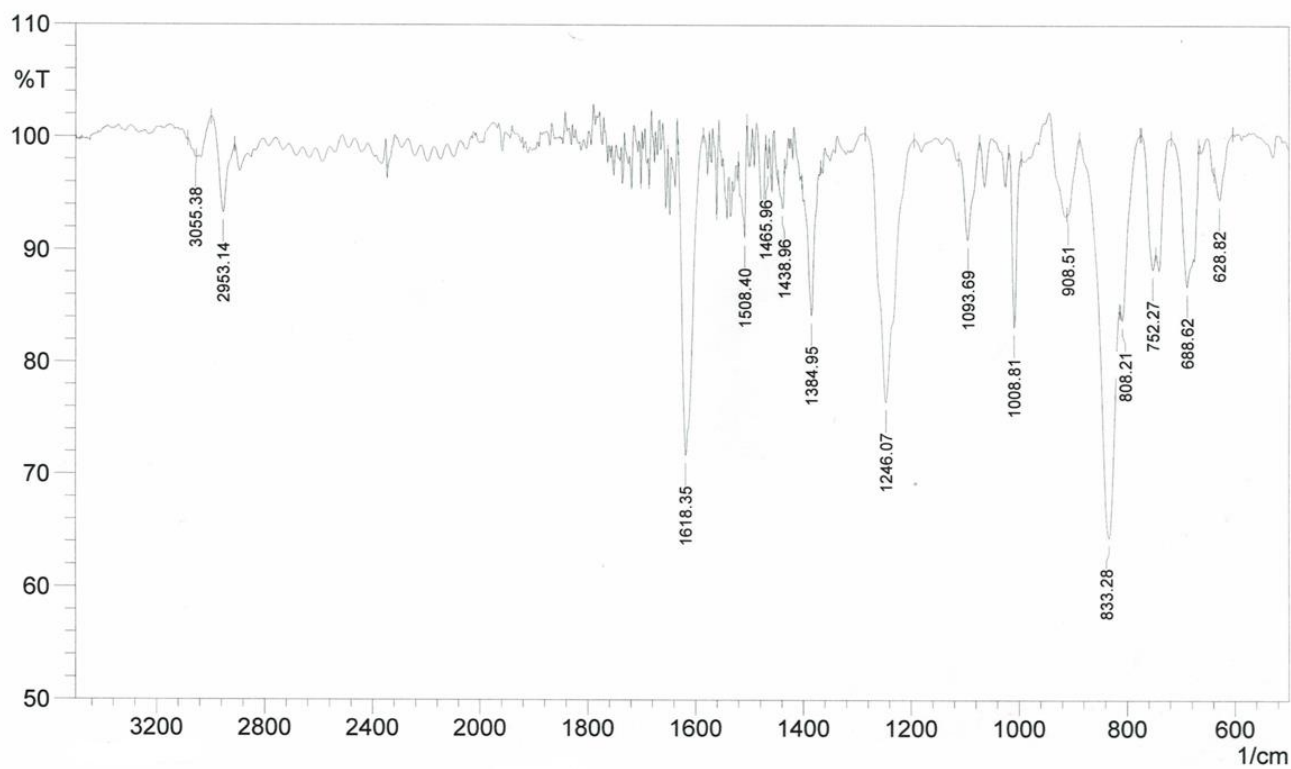

Figure S36. IR spectrum for compound **12**.

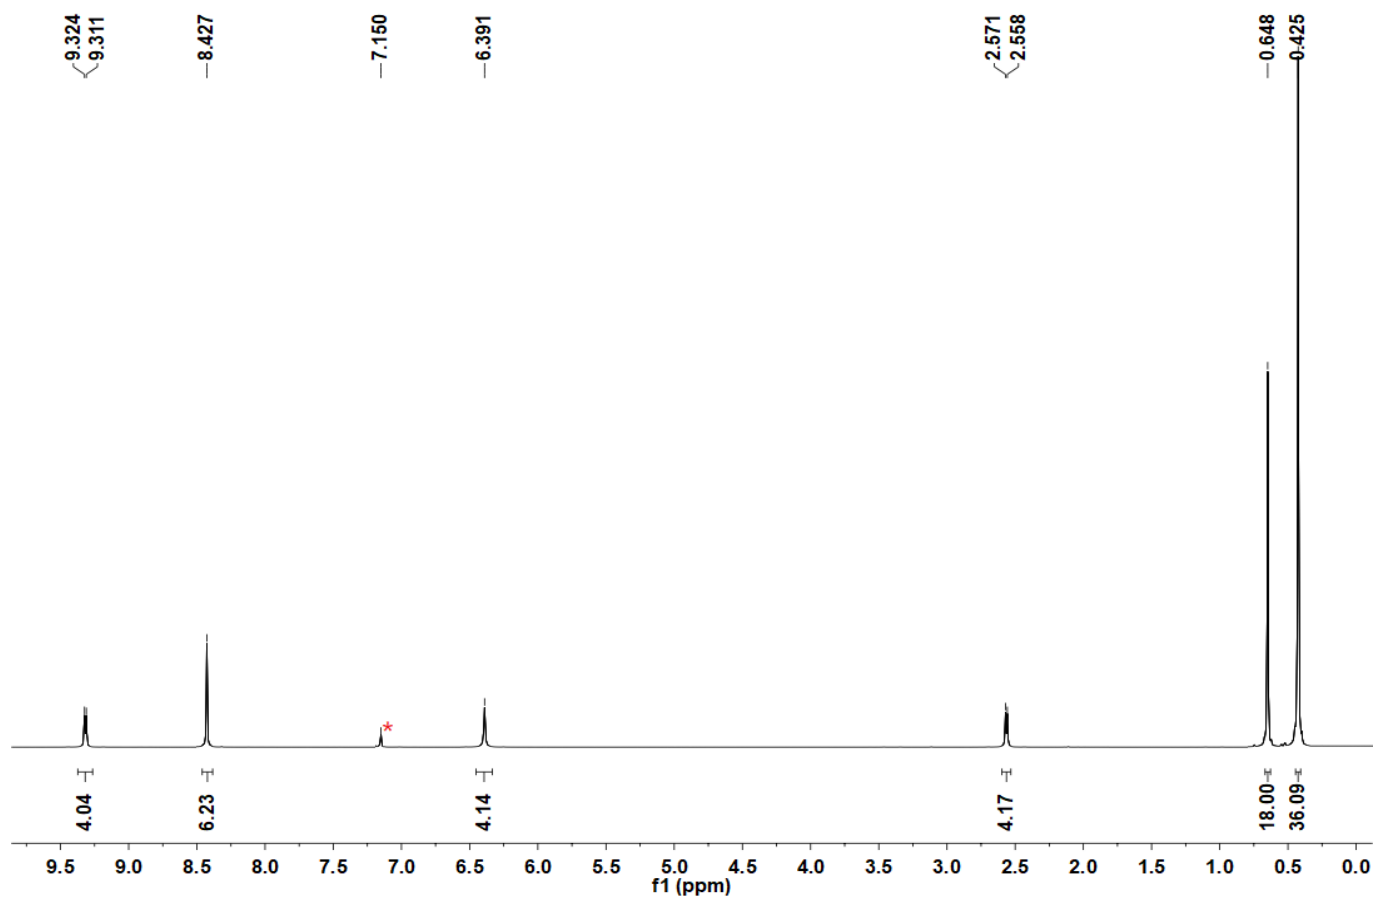

Figure S37.  $^1\text{H}$  NMR spectrum for compound 13.

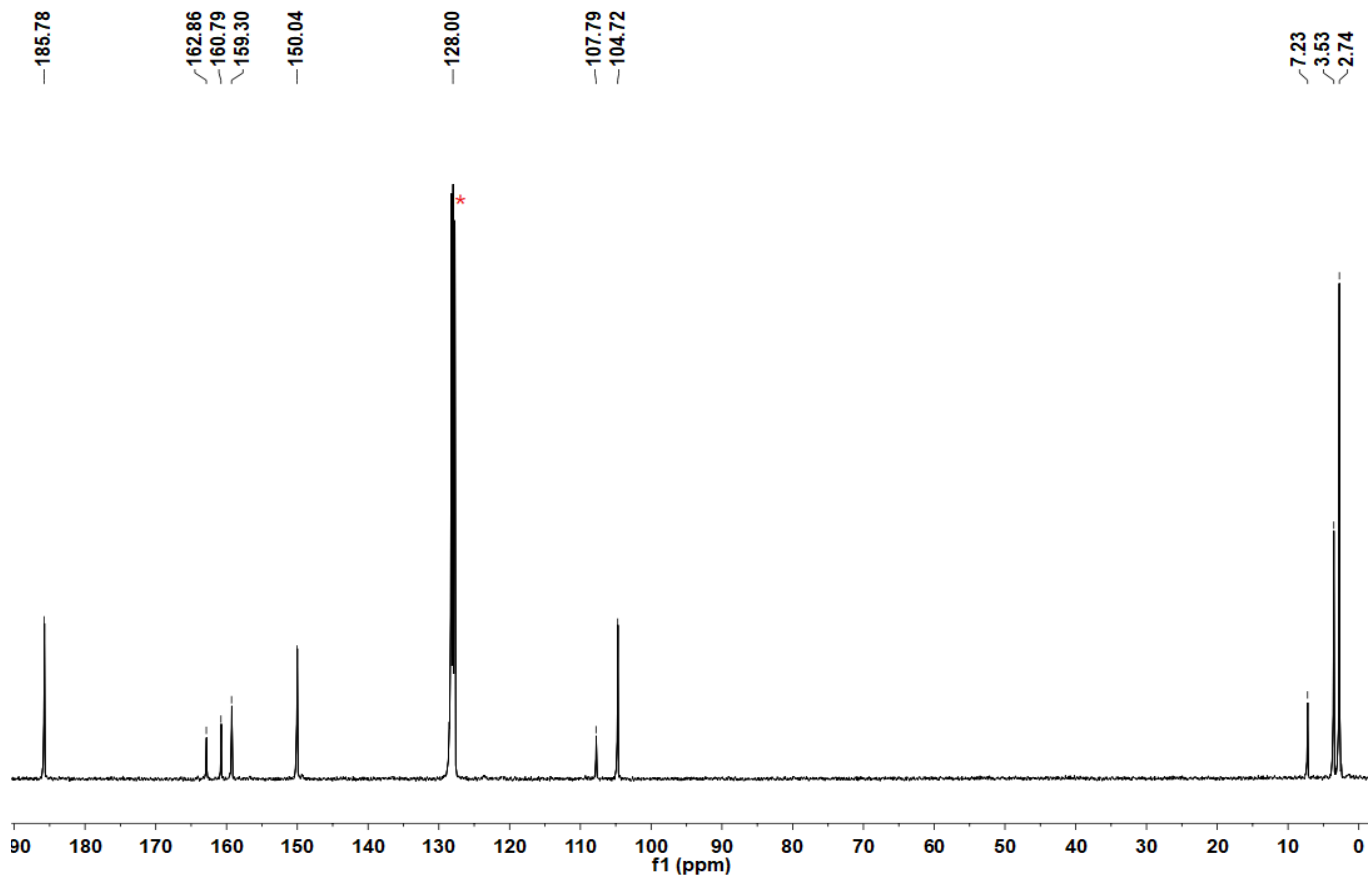

Figure S38.  $^{13}\text{C}$  NMR spectrum for compound 13.

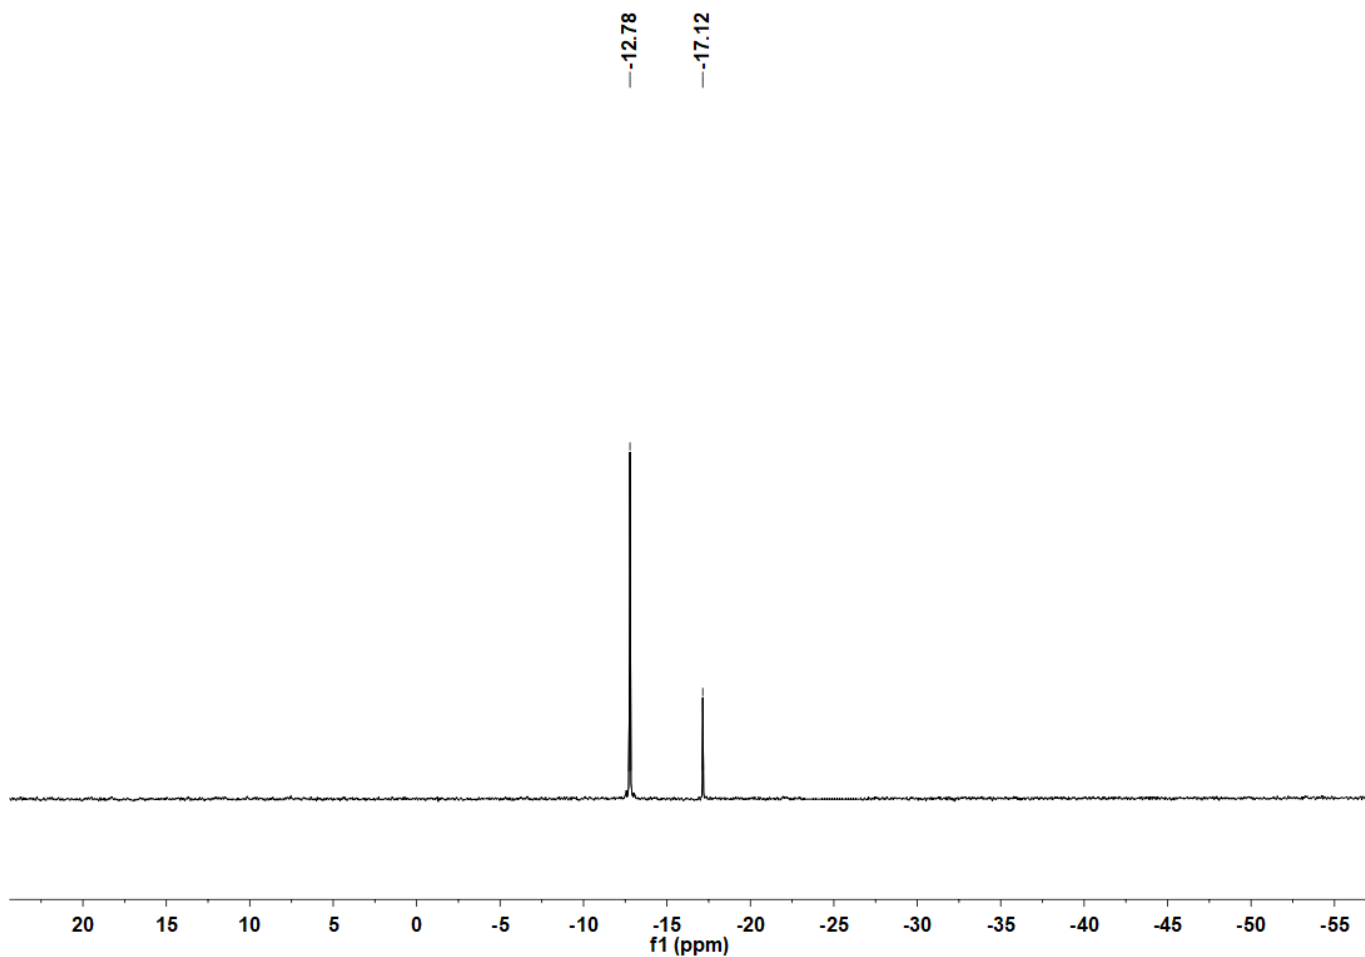

Figure S39.  $^{29}\text{Si}$  NMR spectrum for compound 13.

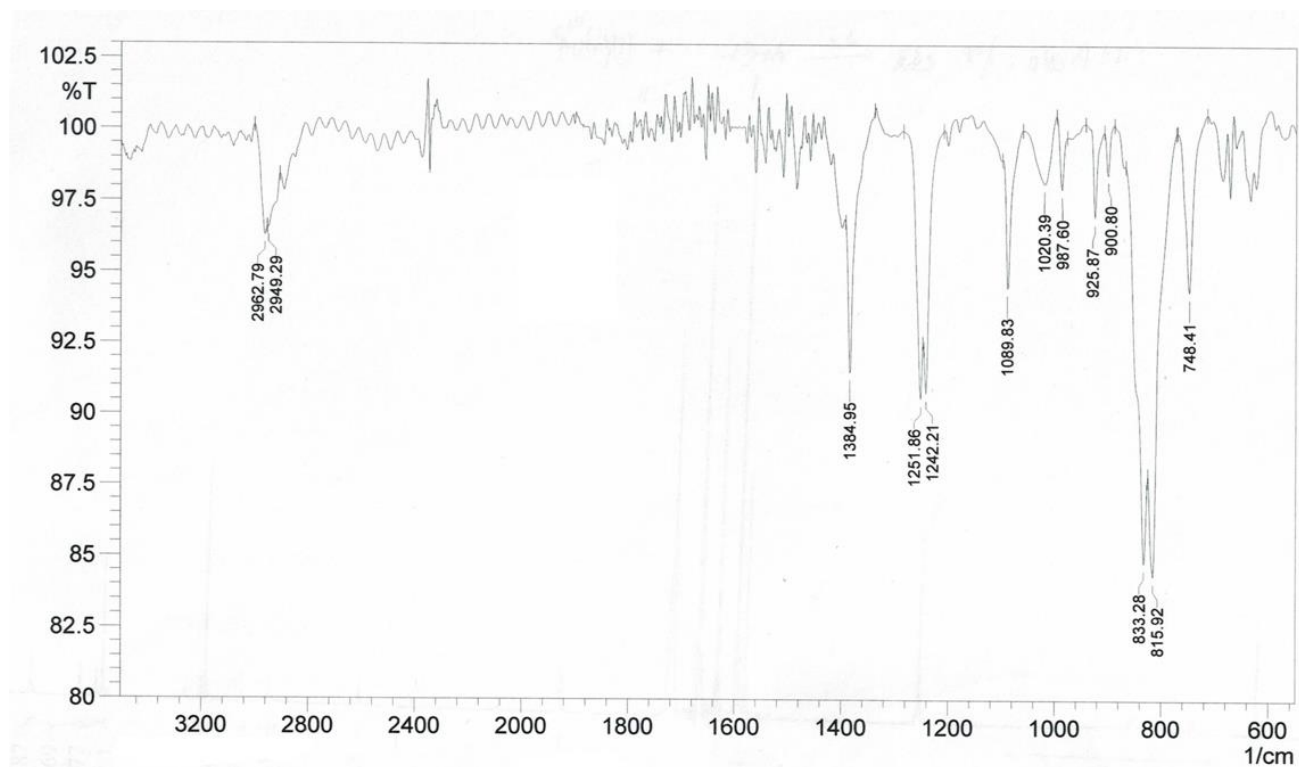

Figure S40. IR spectrum for compound 13.



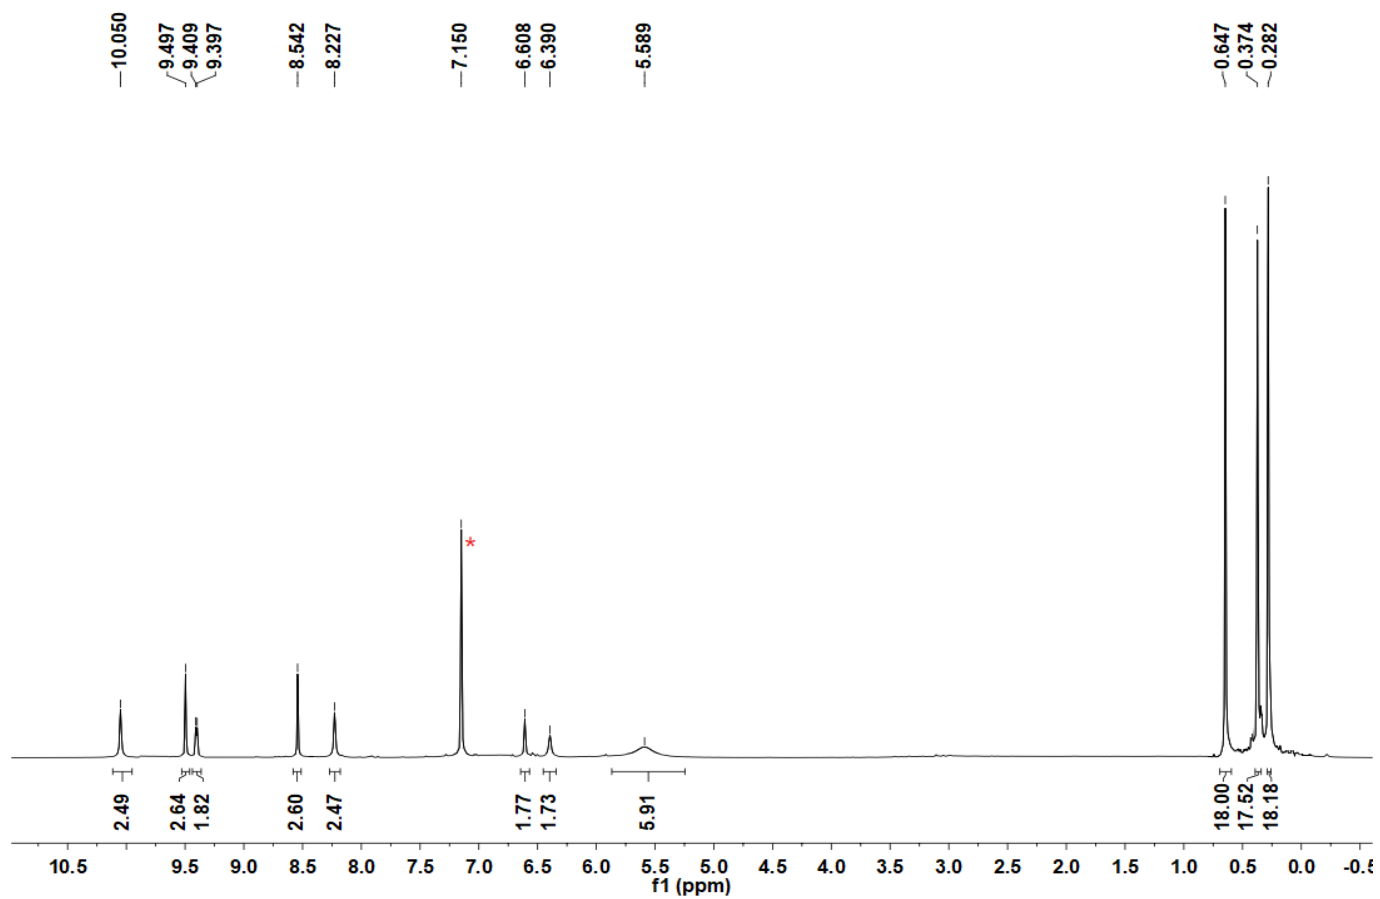

Figure S41. <sup>1</sup>H NMR spectrum for compound 14.

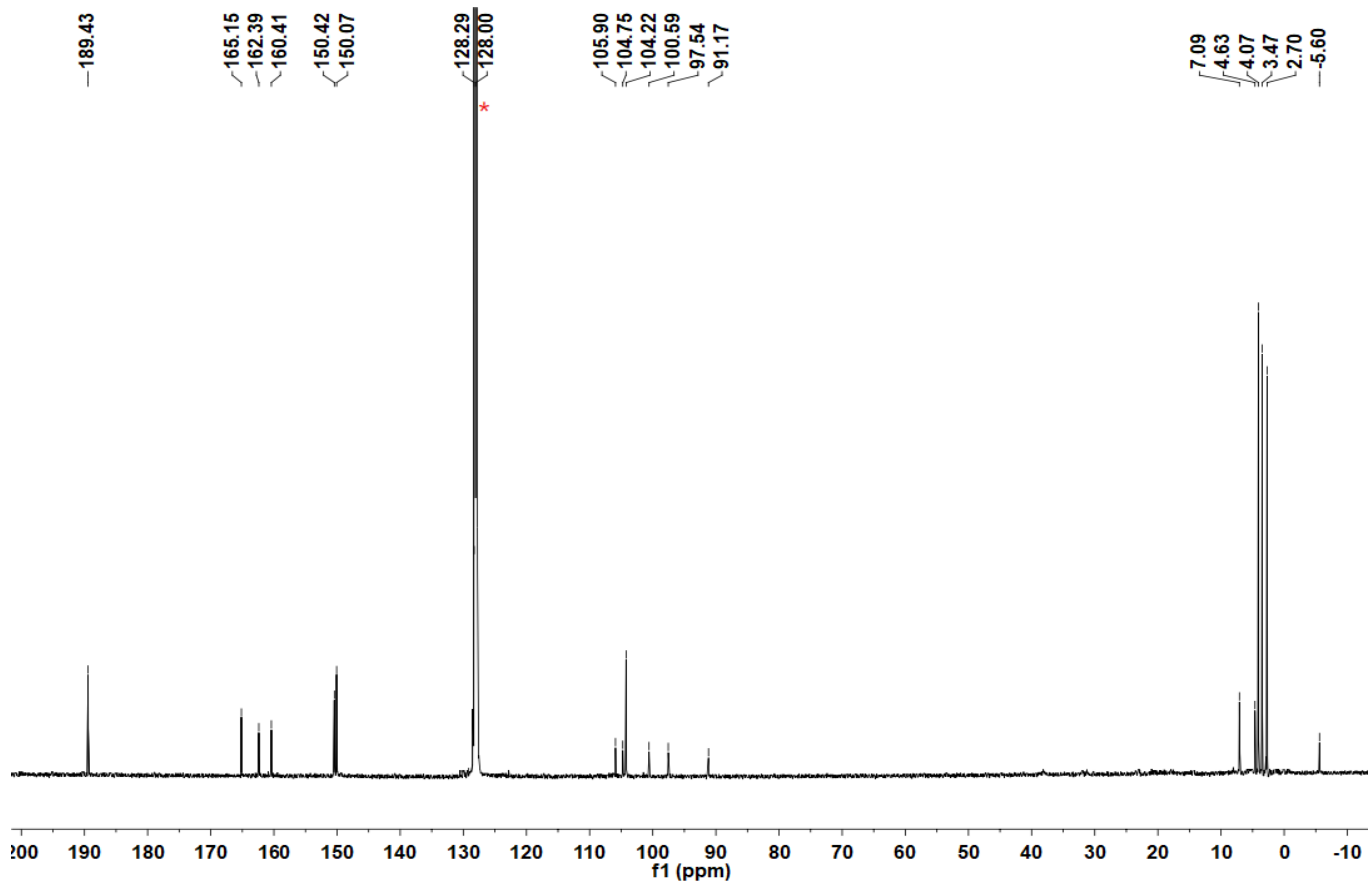

Figure S42. <sup>13</sup>C NMR spectrum for compound 14.

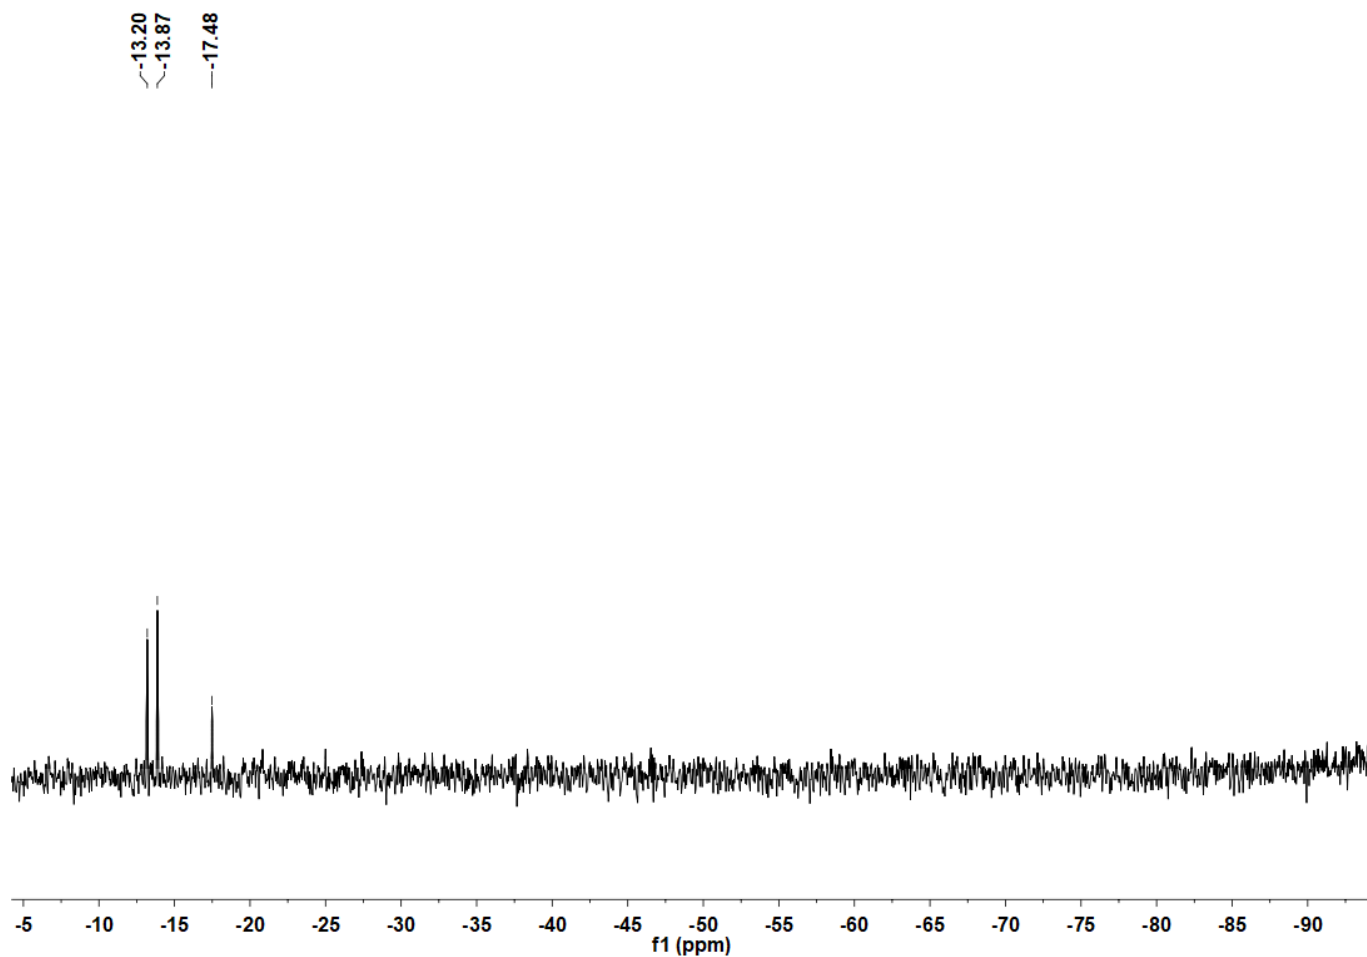

Figure S43. <sup>29</sup>Si NMR spectrum for compound 14.

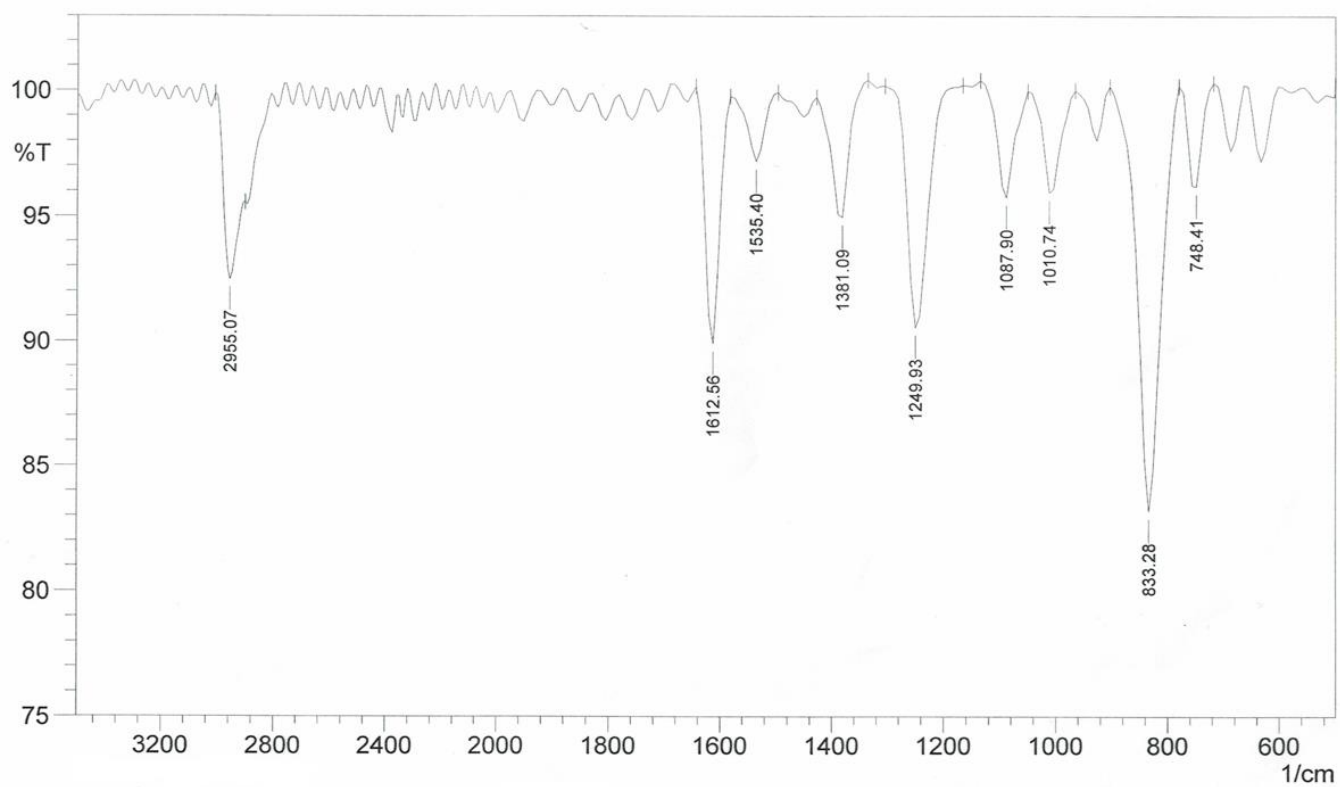

Figure S44. IR spectrum for compound 14.

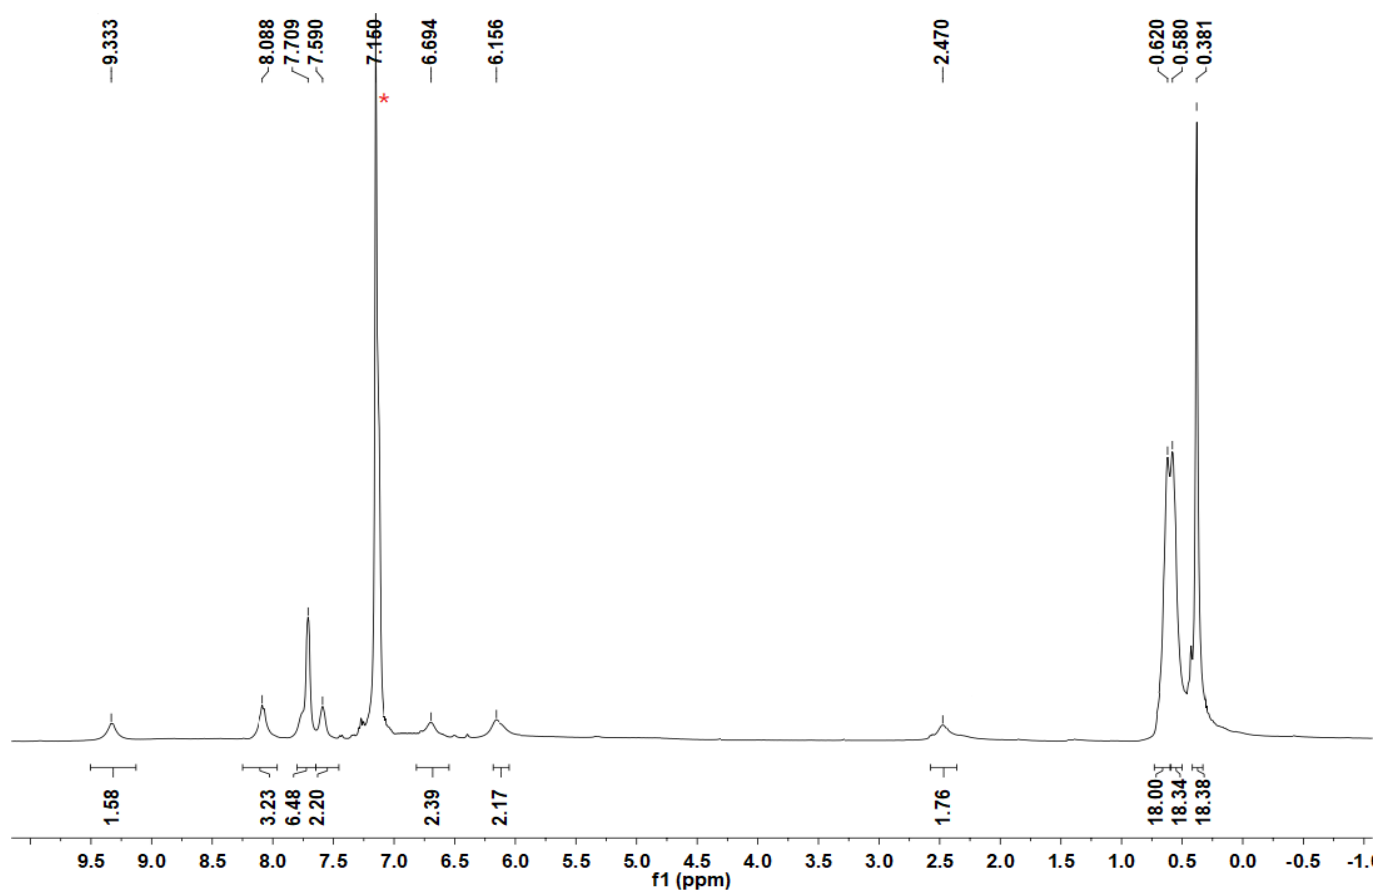

Figure S45. <sup>1</sup>H NMR spectrum for compound **15**.

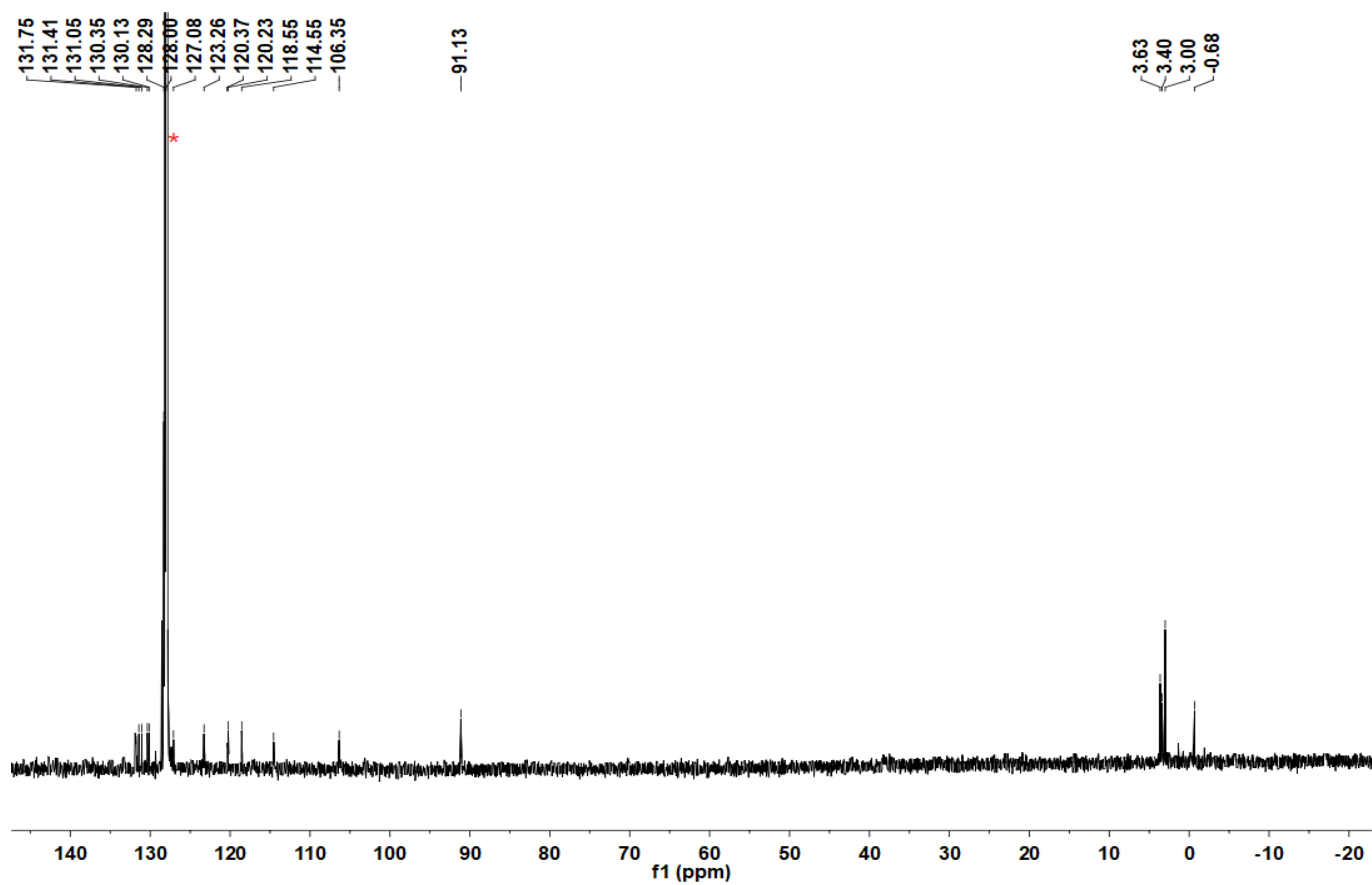

Figure S46. <sup>13</sup>C NMR spectrum for compound **15**.

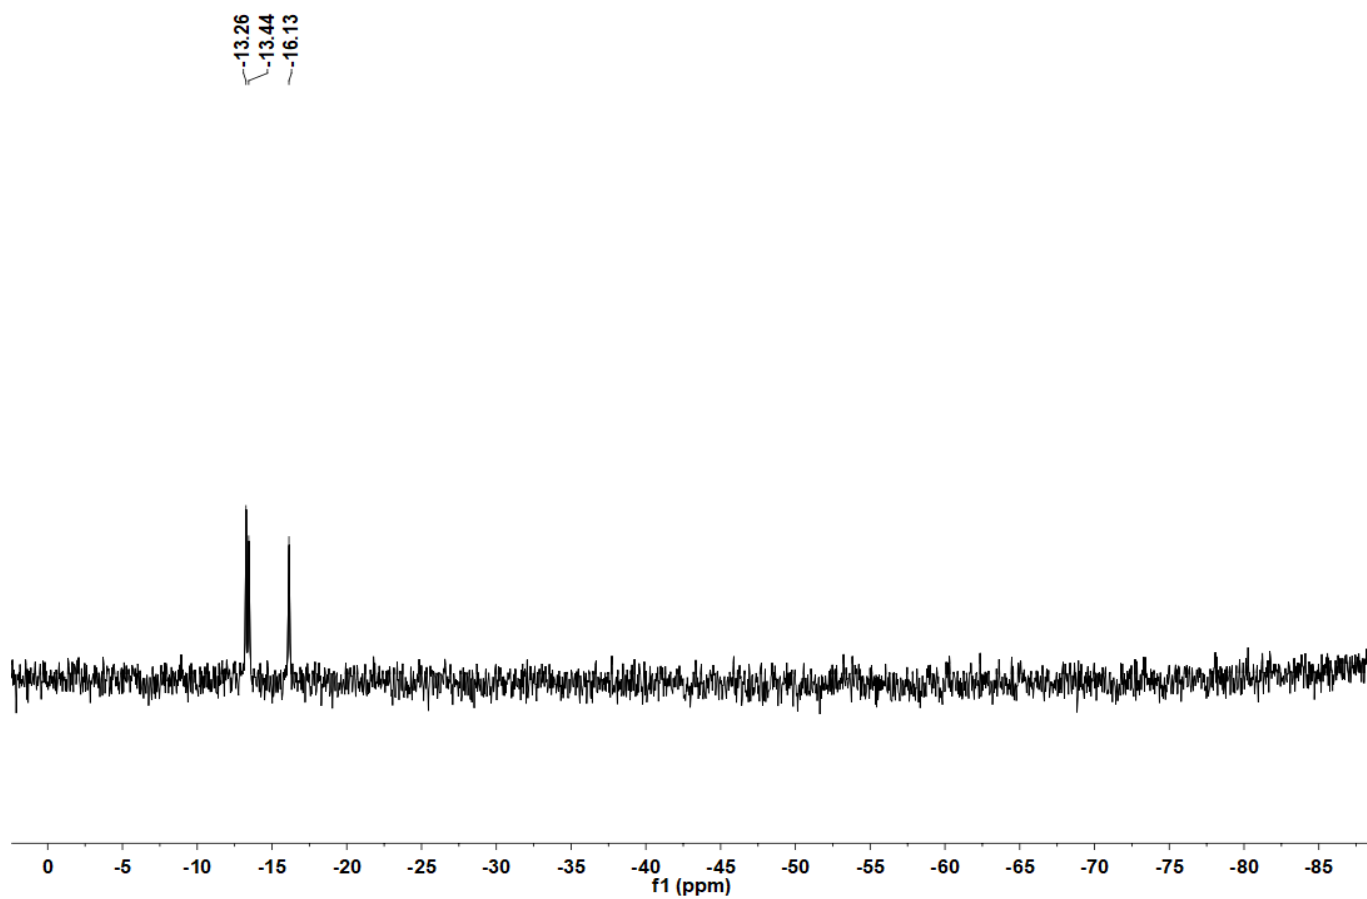

Figure S47.  $^{29}\text{Si}$  NMR spectrum for compound 15.

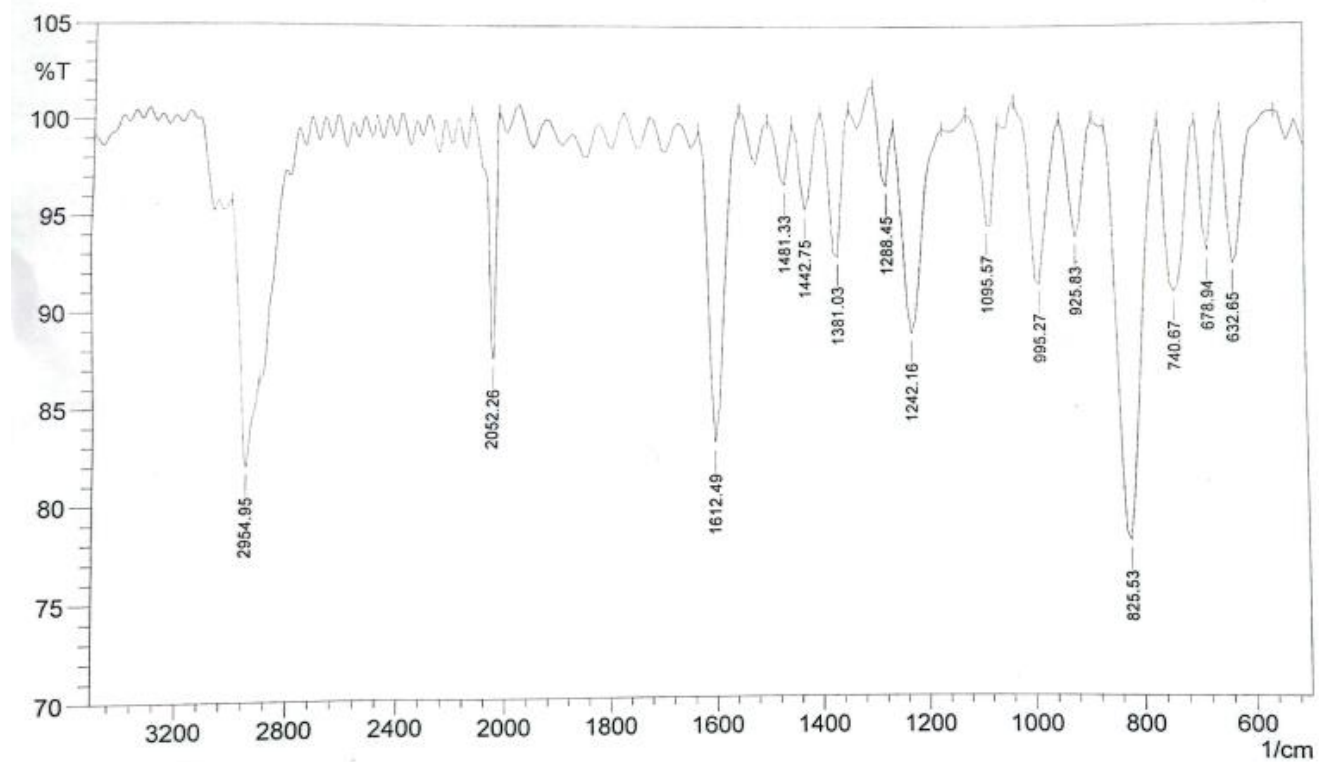

Figure S48. IR spectrum for compound 15.
